# Supplementary material for: A Stochastic Method for Predicting Recovery of Coral Reefs
Source: Research Square preprint supplement (doi:10.21203/rs.3.rs-7310681/v1), 2025-11-07
Supplement: Supplementary file 1 [file Figures used.docx]

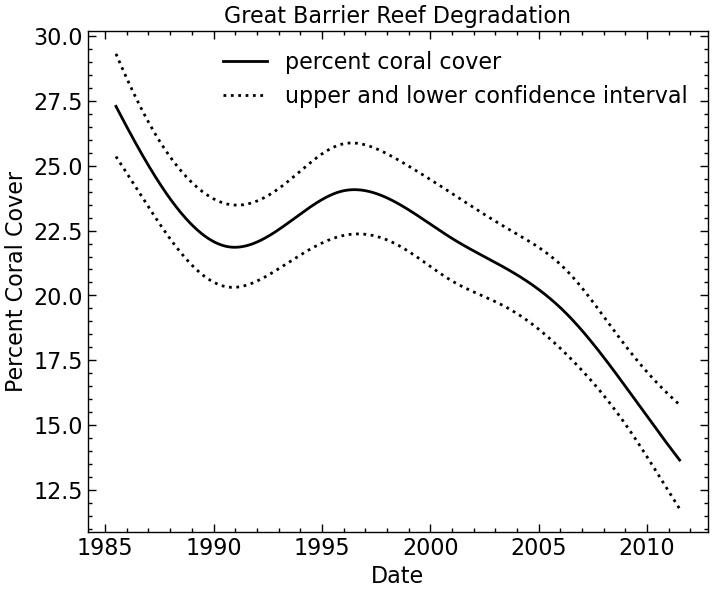


**Fig. 1** Plot of the mean percentage of hard coral cover of the Great Barrier Reef from July 1985 to June 2011. Data obtained from the Australian Institute of Marine Science.


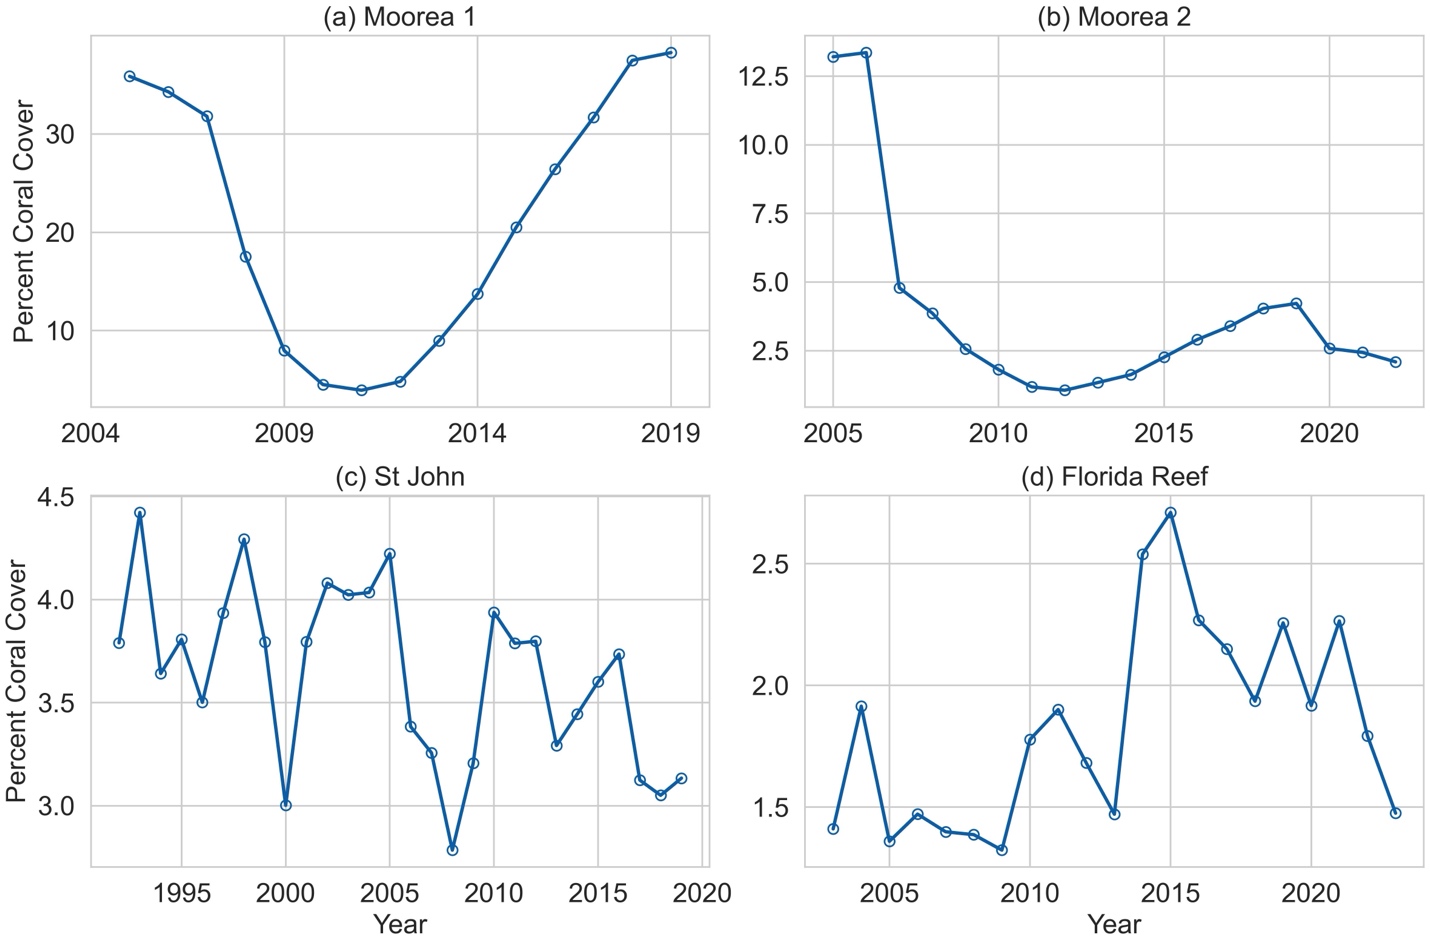


**Fig. 2** Average annual percent coral cover for two datasets of Moorea (French Polynesia): (a) Moorea 1 and (b) Moorea 2, (c) St John in US Virgin Islands and (d) Florida Reef.


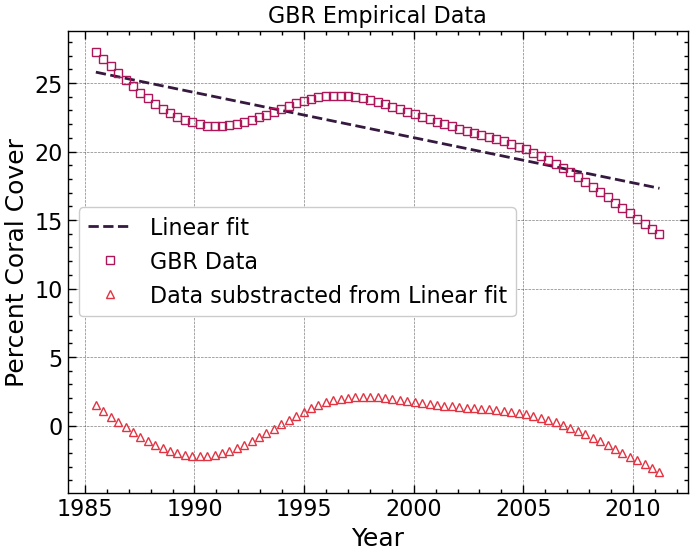


**Fig. 3** Deviations of the raw data from a linear fit (orange curve). The deviations are used to calculate the empirical mean square deviation (MSD) which will be matched with a theoretical MSD.


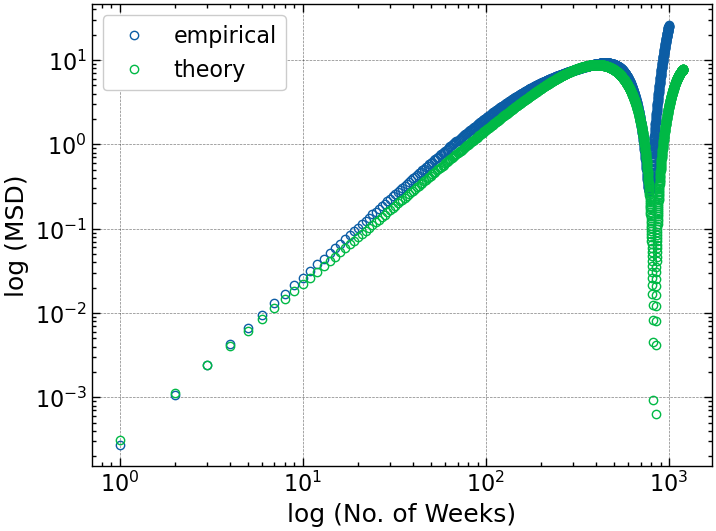


**Fig. 4** Log-log plot of Great Barrier Reef percent hard coral cover empirical (Blue) and Theoretical MSD (Green) using Eq. (6).


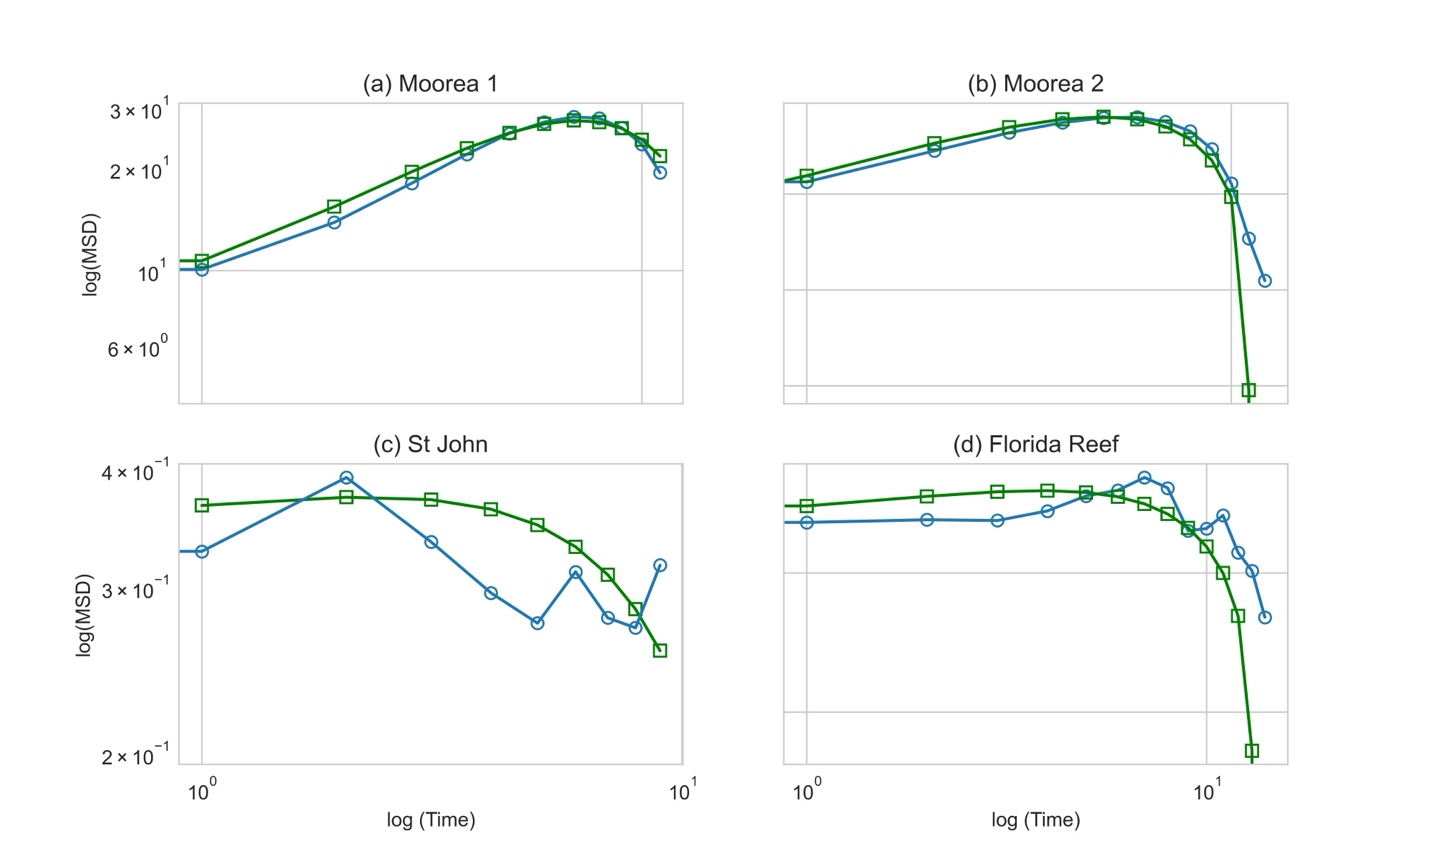


**Fig. 5** Log-log plots of the mean squared deviation (MSD) versus time for (a) Moorea reef 1, (b) Moorea reef 2, (c) St John and (d) Florida Reef. Theoretical model using Eq. (6) in green (squares) while empirical data in blue (circles).


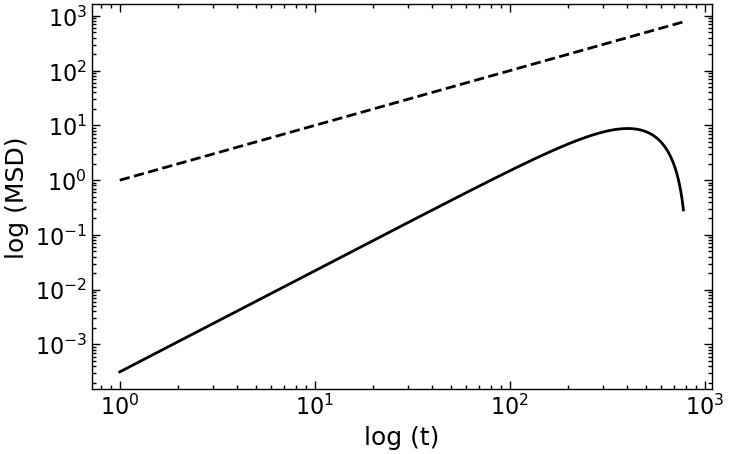


**Figure 6.** Mean square deviation (MSD). Dashed line: Brownian motion (no memory). Curved black line: stochastic process with memory, Eq. (6), describing the GBR.


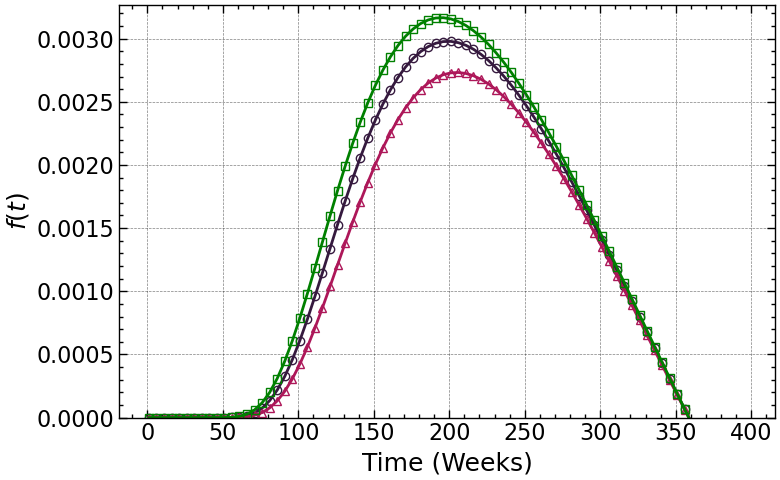


**Fig. 7** Plot of the first passage time density, Eq. (16), for | | equal to 4.69 (circles), 5.36 (squares), and 5.43 (triangles). The peaks of the graphs are at 198 weeks (circles), 193 weeks (squares), and 204 weeks (triangles).


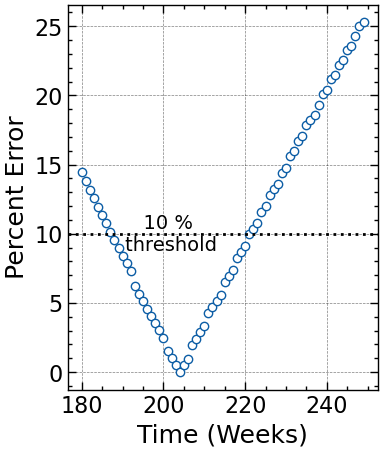


**Fig. 8** Plot of the percent error that compares the predicted value, which corresponds to the time at the peak of Eq. (16), with the actual empirical data from the GBR**.** Here, we set the initial value at zero, and the threshold value or “cliff point ” ranges from 180 to 250.


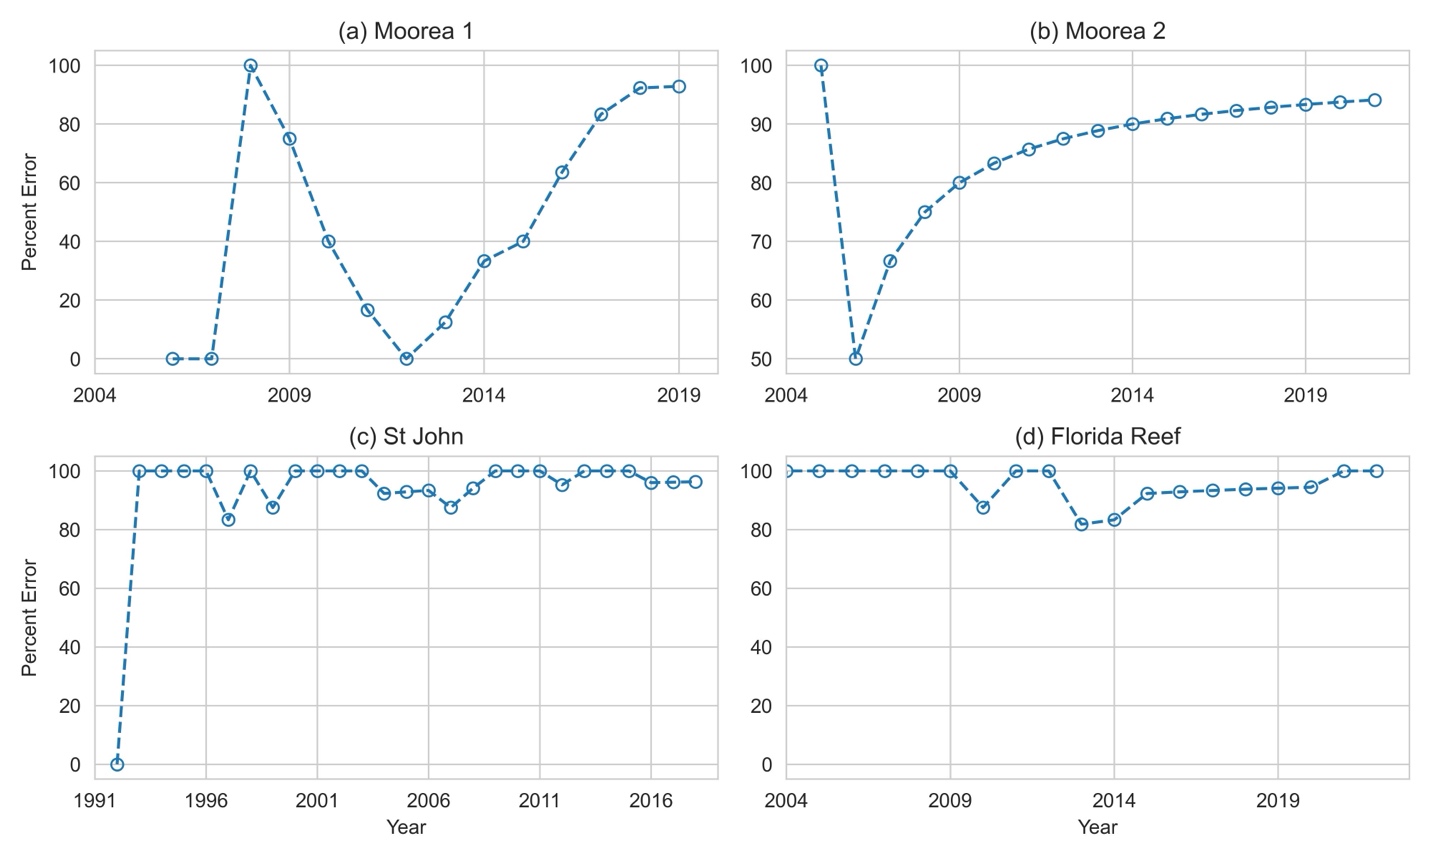


**Fig. 9** Plot of the percent errors comparing the predicted time (the time corresponding to the peak of Eq. (16)) vs. the actual time (from the empirical data) for (a) Moorea 1, (b) Moorea 2, (c) St John and (d) Florida Reef.


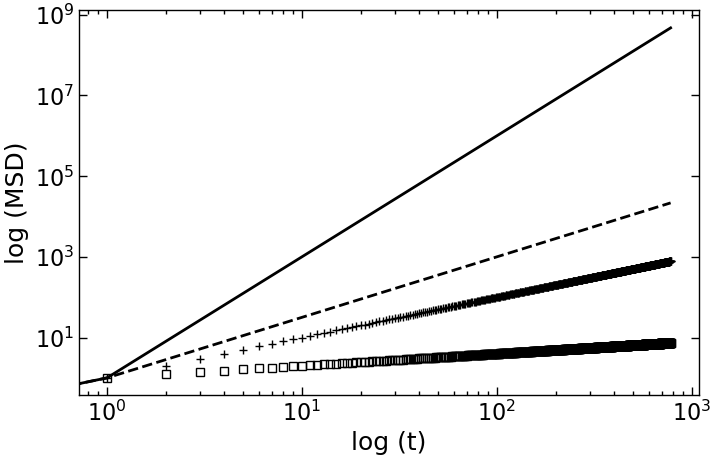


**Fig. 10** MSD plots of Eq. (17) for different diffusion regimes at . Subdiffusive (open box, ); memoryless Brownian motion (cross, ); Superdiffusive (dashed line, ); and Hyperballistic diffusion (solid line, ).
