# Supplementary material for: A Stochastic Method for Predicting Recovery of Coral Reefs
Source: Research Square preprint supplement (doi:10.21203/rs.3.rs-7310681/v1), 2025-11-07
Supplement: Supplementary file 2 [file DataGBR.xlsx]

## Sheet: trendgbr-coral-cover-with-ci
Time	Date	Mean live coral cover (percent)	Lower confidence interval	Upper confidence interval	Confidence interval span
1	1985.5	27.2944	25.3577	29.3208	3.96304
2	1985.53	27.2526	25.3245	29.27	3.94542
3	1985.55	27.2109	25.2913	29.2193	3.92798
4	1985.58	27.1693	25.258	29.1687	3.91072
5	1985.6	27.1277	25.2247	29.1183	3.89365
6	1985.63	27.0861	25.1913	29.068	3.87676
7	1985.66	27.0446	25.1579	29.0179	3.86006
8	1985.68	27.0031	25.1244	28.968	3.84355
9	1985.71	26.9617	25.0909	28.9181	3.82724
10	1985.73	26.9204	25.0574	28.8685	3.81111
11	1985.76	26.8791	25.0238	28.819	3.79518
12	1985.79	26.8378	24.9902	28.7696	3.77944
13	1985.81	26.7966	24.9566	28.7205	3.7639
14	1985.84	26.7555	24.9229	28.6715	3.74855
15	1985.86	26.7145	24.8892	28.6226	3.73341
16	1985.89	26.6735	24.8555	28.5739	3.71847
17	1985.92	26.6326	24.8217	28.5254	3.70373
18	1985.94	26.5917	24.7879	28.4771	3.68919
19	1985.97	26.551	24.7541	28.429	3.67485
20	1985.99	26.5103	24.7203	28.381	3.66072
21	1986.02	26.4696	24.6864	28.3332	3.6468
22	1986.05	26.4291	24.6525	28.2856	3.63308
23	1986.07	26.3886	24.6186	28.2382	3.61957
24	1986.1	26.3482	24.5847	28.191	3.60626
25	1986.12	26.3079	24.5508	28.1439	3.59317
26	1986.15	26.2677	24.5168	28.0971	3.58028
27	1986.18	26.2276	24.4828	28.0504	3.56761
28	1986.2	26.1875	24.4488	28.004	3.55514
29	1986.23	26.1475	24.4148	27.9577	3.54289
30	1986.25	26.1077	24.3808	27.9117	3.53085
31	1986.28	26.0679	24.3468	27.8658	3.51902
32	1986.31	26.0282	24.3128	27.8202	3.5074
33	1986.33	25.9886	24.2788	27.7748	3.49599
34	1986.36	25.9491	24.2447	27.7295	3.4848
35	1986.38	25.9098	24.2107	27.6845	3.47381
36	1986.41	25.8705	24.1767	27.6397	3.46304
37	1986.44	25.8313	24.1426	27.5951	3.45248
38	1986.46	25.7922	24.1086	27.5507	3.44213
39	1986.49	25.7532	24.0746	27.5066	3.43199
40	1986.52	25.7144	24.0405	27.4626	3.42207
41	1986.54	25.6756	24.0065	27.4189	3.41235
42	1986.57	25.637	23.9725	27.3754	3.40284
43	1986.59	25.5984	23.9385	27.3321	3.39354
44	1986.62	25.56	23.9046	27.289	3.38446
45	1986.65	25.5217	23.8706	27.2462	3.37557
46	1986.67	25.4835	23.8367	27.2036	3.3669
47	1986.7	25.4455	23.8027	27.1612	3.35843
48	1986.72	25.4075	23.7689	27.119	3.35017
49	1986.75	25.3697	23.735	27.0771	3.34211
50	1986.78	25.332	23.7011	27.0354	3.33426
51	1986.8	25.2945	23.6673	26.9939	3.3266
52	1986.83	25.257	23.6335	26.9527	3.31915
53	1986.85	25.2197	23.5998	26.9117	3.3119
54	1986.88	25.1825	23.566	26.8709	3.30484
55	1986.91	25.1455	23.5324	26.8303	3.29799
56	1986.93	25.1085	23.4987	26.79	3.29133
57	1986.96	25.0718	23.4651	26.75	3.28486
58	1986.98	25.0351	23.4316	26.7101	3.27858
59	1987.01	24.9986	23.398	26.6705	3.2725
60	1987.04	24.9622	23.3646	26.6312	3.2666
61	1987.06	24.926	23.3312	26.5921	3.2609
62	1987.09	24.8899	23.2978	26.5532	3.25537
63	1987.11	24.854	23.2645	26.5145	3.25003
64	1987.14	24.8182	23.2312	26.4761	3.24487
65	1987.17	24.7825	23.1981	26.438	3.2399
66	1987.19	24.747	23.1649	26.4	3.2351
67	1987.22	24.7117	23.1319	26.3624	3.23047
68	1987.24	24.6765	23.0989	26.3249	3.22602
69	1987.27	24.6414	23.066	26.2877	3.22174
70	1987.3	24.6065	23.0331	26.2508	3.21763
71	1987.32	24.5718	23.0004	26.214	3.21368
72	1987.35	24.5372	22.9677	26.1776	3.2099
73	1987.37	24.5028	22.935	26.1413	3.20628
74	1987.4	24.4685	22.9025	26.1053	3.20282
75	1987.43	24.4344	22.8701	26.0696	3.19952
76	1987.45	24.4005	22.8377	26.0341	3.19637
77	1987.48	24.3667	22.8055	25.9988	3.19338
78	1987.5	24.3331	22.7733	25.9638	3.19053
79	1987.53	24.2997	22.7412	25.9291	3.18784
80	1987.56	24.2664	22.7092	25.8945	3.18528
81	1987.58	24.2333	22.6774	25.8602	3.18287
82	1987.61	24.2003	22.6456	25.8262	3.1806
83	1987.63	24.1676	22.6139	25.7924	3.17846
84	1987.66	24.135	22.5824	25.7588	3.17646
85	1987.69	24.1026	22.5509	25.7255	3.17459
86	1987.71	24.0704	22.5196	25.6925	3.17284
87	1987.74	24.0383	22.4884	25.6596	3.17123
88	1987.76	24.0064	22.4573	25.6271	3.16973
89	1987.79	23.9747	22.4264	25.5947	3.16836
90	1987.82	23.9432	22.3955	25.5626	3.1671
91	1987.84	23.9119	22.3648	25.5308	3.16596
92	1987.87	23.8807	22.3342	25.4992	3.16493
93	1987.89	23.8498	22.3038	25.4678	3.16401
94	1987.92	23.819	22.2735	25.4367	3.16319
95	1987.95	23.7884	22.2433	25.4058	3.16248
96	1987.97	23.758	22.2133	25.3751	3.16187
97	1988	23.7278	22.1834	25.3447	3.16135
98	1988.02	23.6978	22.1536	25.3146	3.16093
99	1988.05	23.668	22.1241	25.2847	3.16061
100	1988.08	23.6384	22.0946	25.255	3.16037
101	1988.1	23.6089	22.0653	25.2256	3.16022
102	1988.13	23.5797	22.0362	25.1964	3.16015
103	1988.15	23.5507	22.0072	25.1674	3.16016
104	1988.18	23.5218	21.9784	25.1387	3.16025
105	1988.21	23.4932	21.9498	25.1102	3.16042
106	1988.23	23.4648	21.9213	25.082	3.16065
107	1988.26	23.4366	21.893	25.054	3.16096
108	1988.28	23.4086	21.8649	25.0263	3.16134
109	1988.31	23.3807	21.837	24.9988	3.16177
110	1988.34	23.3531	21.8092	24.9715	3.16227
111	1988.36	23.3258	21.7816	24.9445	3.16283
112	1988.39	23.2986	21.7542	24.9177	3.16345
113	1988.41	23.2716	21.727	24.8911	3.16412
114	1988.44	23.2448	21.7	24.8648	3.16484
115	1988.47	23.2183	21.6731	24.8387	3.1656
116	1988.49	23.192	21.6465	24.8129	3.16641
117	1988.52	23.1659	21.62	24.7873	3.16727
118	1988.55	23.14	21.5938	24.7619	3.16816
119	1988.57	23.1143	21.5677	24.7368	3.1691
120	1988.6	23.0889	21.5419	24.7119	3.17007
121	1988.62	23.0636	21.5162	24.6873	3.17107
122	1988.65	23.0386	21.4908	24.6629	3.1721
123	1988.68	23.0138	21.4656	24.6387	3.17316
124	1988.7	22.9893	21.4406	24.6148	3.17424
125	1988.73	22.9649	21.4158	24.5911	3.17535
126	1988.75	22.9408	21.3912	24.5677	3.17648
127	1988.78	22.917	21.3668	24.5444	3.17763
128	1988.81	22.8933	21.3427	24.5215	3.17879
129	1988.83	22.8699	21.3188	24.4987	3.17997
130	1988.86	22.8467	21.2951	24.4762	3.18115
131	1988.88	22.8238	21.2716	24.454	3.18235
132	1988.91	22.8011	21.2484	24.432	3.18355
133	1988.94	22.7786	21.2254	24.4102	3.18476
134	1988.96	22.7563	21.2027	24.3886	3.18598
135	1988.99	22.7343	21.1801	24.3673	3.18719
136	1989.01	22.7126	21.1579	24.3463	3.1884
137	1989.04	22.6911	21.1358	24.3254	3.18961
138	1989.07	22.6698	21.114	24.3049	3.19081
139	1989.09	22.6488	21.0925	24.2845	3.192
140	1989.12	22.628	21.0712	24.2644	3.19319
141	1989.14	22.6074	21.0502	24.2445	3.19436
142	1989.17	22.5871	21.0294	24.2249	3.19552
143	1989.2	22.5671	21.0088	24.2055	3.19667
144	1989.22	22.5473	20.9886	24.1864	3.1978
145	1989.25	22.5278	20.9686	24.1675	3.19891
146	1989.27	22.5085	20.9488	24.1488	3.2
147	1989.3	22.4894	20.9293	24.1304	3.20106
148	1989.33	22.4706	20.9101	24.1122	3.20211
149	1989.35	22.4521	20.8911	24.0942	3.20313
150	1989.38	22.4339	20.8724	24.0765	3.20412
151	1989.4	22.4158	20.854	24.0591	3.20508
152	1989.43	22.3981	20.8359	24.0419	3.20601
153	1989.46	22.3806	20.818	24.0249	3.20691
154	1989.48	22.3634	20.8004	24.0082	3.20778
155	1989.51	22.3464	20.7831	23.9917	3.20862
156	1989.53	22.3297	20.7661	23.9755	3.20941
157	1989.56	22.3133	20.7493	23.9595	3.21017
158	1989.59	22.2971	20.7328	23.9437	3.2109
159	1989.61	22.2812	20.7167	23.9282	3.21158
160	1989.64	22.2656	20.7008	23.913	3.21222
161	1989.66	22.2502	20.6852	23.898	3.21281
162	1989.69	22.2351	20.6699	23.8832	3.21337
163	1989.72	22.2203	20.6549	23.8687	3.21388
164	1989.74	22.2058	20.6401	23.8545	3.21434
165	1989.77	22.1915	20.6257	23.8405	3.21476
166	1989.79	22.1775	20.6116	23.8267	3.21513
167	1989.82	22.1638	20.5978	23.8132	3.21545
168	1989.85	22.1504	20.5843	23.8	3.21572
169	1989.87	22.1373	20.5711	23.787	3.21593
170	1989.9	22.1244	20.5582	23.7743	3.2161
171	1989.92	22.1118	20.5456	23.7618	3.21622
172	1989.95	22.0995	20.5333	23.7496	3.21628
173	1989.98	22.0875	20.5213	23.7376	3.21628
174	1990	22.0758	20.5096	23.7259	3.21624
175	1990.03	22.0644	20.4983	23.7144	3.21613
176	1990.05	22.0532	20.4873	23.7032	3.21597
177	1990.08	22.0424	20.4765	23.6923	3.21576
178	1990.11	22.0318	20.4661	23.6816	3.21548
179	1990.13	22.0216	20.4561	23.6712	3.21515
180	1990.16	22.0116	20.4463	23.6611	3.21476
181	1990.18	22.0019	20.4369	23.6512	3.21431
182	1990.21	21.9926	20.4278	23.6416	3.21381
183	1990.24	21.9835	20.419	23.6323	3.21324
184	1990.26	21.9747	20.4106	23.6232	3.21261
185	1990.29	21.9663	20.4025	23.6144	3.21193
186	1990.31	21.9581	20.3947	23.6059	3.21118
187	1990.34	21.9503	20.3872	23.5976	3.21037
188	1990.37	21.9427	20.3801	23.5896	3.20951
189	1990.39	21.9355	20.3733	23.5819	3.20858
190	1990.42	21.9285	20.3669	23.5745	3.20759
191	1990.44	21.9219	20.3608	23.5673	3.20654
192	1990.47	21.9156	20.355	23.5605	3.20543
193	1990.5	21.9096	20.3496	23.5539	3.20426
194	1990.52	21.9039	20.3445	23.5476	3.20303
195	1990.55	21.8986	20.3398	23.5415	3.20175
196	1990.58	21.8935	20.3354	23.5358	3.2004
197	1990.6	21.8888	20.3313	23.5303	3.19899
198	1990.63	21.8844	20.3277	23.5252	3.19753
199	1990.65	21.8803	20.3243	23.5203	3.19601
200	1990.68	21.8766	20.3213	23.5157	3.19443
201	1990.71	21.8731	20.3187	23.5115	3.19279
202	1990.73	21.87	20.3164	23.5075	3.1911
203	1990.76	21.8673	20.3144	23.5038	3.18935
204	1990.78	21.8648	20.3128	23.5004	3.18756
205	1990.81	21.8627	20.3116	23.4973	3.18571
206	1990.84	21.8608	20.3106	23.4945	3.18382
207	1990.86	21.8593	20.3101	23.4919	3.18188
208	1990.89	21.8581	20.3098	23.4897	3.1799
209	1990.91	21.8572	20.3098	23.4877	3.17787
210	1990.94	21.8566	20.3102	23.486	3.17582
211	1990.97	21.8563	20.3109	23.4846	3.17372
212	1990.99	21.8563	20.3119	23.4835	3.17159
213	1991.02	21.8566	20.3133	23.4827	3.16943
214	1991.04	21.8572	20.3149	23.4821	3.16724
215	1991.07	21.8581	20.3168	23.4818	3.16503
216	1991.1	21.8592	20.319	23.4818	3.16279
217	1991.12	21.8607	20.3215	23.4821	3.16053
218	1991.15	21.8624	20.3243	23.4826	3.15825
219	1991.17	21.8644	20.3274	23.4834	3.15595
220	1991.2	21.8667	20.3308	23.4844	3.15364
221	1991.23	21.8693	20.3344	23.4858	3.15132
222	1991.25	21.8721	20.3384	23.4873	3.14899
223	1991.28	21.8752	20.3425	23.4892	3.14665
224	1991.3	21.8785	20.347	23.4913	3.1443
225	1991.33	21.8821	20.3517	23.4937	3.14196
226	1991.36	21.886	20.3567	23.4963	3.13961
227	1991.38	21.8901	20.3619	23.4992	3.13727
228	1991.41	21.8945	20.3674	23.5023	3.13494
229	1991.43	21.8991	20.3731	23.5057	3.13261
230	1991.46	21.904	20.3791	23.5094	3.13029
231	1991.49	21.9091	20.3853	23.5133	3.12799
232	1991.51	21.9145	20.3917	23.5174	3.1257
233	1991.54	21.9201	20.3984	23.5218	3.12343
234	1991.56	21.9259	20.4053	23.5264	3.12118
235	1991.59	21.932	20.4124	23.5313	3.11895
236	1991.62	21.9383	20.4197	23.5364	3.11674
237	1991.64	21.9448	20.4273	23.5418	3.11457
238	1991.67	21.9516	20.435	23.5474	3.11243
239	1991.69	21.9586	20.443	23.5533	3.11031
240	1991.72	21.9658	20.4511	23.5594	3.10824
241	1991.75	21.9732	20.4595	23.5657	3.1062
242	1991.77	21.9808	20.4681	23.5723	3.1042
243	1991.8	21.9887	20.4768	23.5791	3.10224
244	1991.82	21.9967	20.4858	23.5861	3.10033
245	1991.85	22.005	20.4949	23.5934	3.09846
246	1991.88	22.0135	20.5042	23.6008	3.09665
247	1991.9	22.0221	20.5137	23.6086	3.09488
248	1991.93	22.031	20.5233	23.6165	3.09317
249	1991.95	22.0401	20.5332	23.6247	3.09151
250	1991.98	22.0493	20.5432	23.6331	3.08991
251	1992.01	22.0588	20.5533	23.6417	3.08838
252	1992.03	22.0684	20.5636	23.6505	3.0869
253	1992.06	22.0782	20.5741	23.6596	3.08549
254	1992.08	22.0882	20.5847	23.6688	3.08414
255	1992.11	22.0984	20.5955	23.6783	3.08286
256	1992.14	22.1088	20.6064	23.688	3.08166
257	1992.16	22.1193	20.6174	23.6979	3.08052
258	1992.19	22.13	20.6286	23.708	3.07946
259	1992.21	22.1409	20.6399	23.7184	3.07848
260	1992.24	22.1519	20.6513	23.7289	3.07757
261	1992.27	22.1631	20.6629	23.7397	3.07674
262	1992.29	22.1745	20.6746	23.7506	3.07599
263	1992.32	22.186	20.6864	23.7617	3.07533
264	1992.34	22.1977	20.6983	23.7731	3.07475
265	1992.37	22.2095	20.7104	23.7846	3.07426
266	1992.4	22.2215	20.7225	23.7964	3.07385
267	1992.42	22.2336	20.7348	23.8083	3.07353
268	1992.45	22.2459	20.7471	23.8204	3.07331
269	1992.47	22.2583	20.7596	23.8327	3.07317
270	1992.5	22.2709	20.7721	23.8452	3.07313
271	1992.53	22.2836	20.7847	23.8579	3.07318
272	1992.55	22.2964	20.7975	23.8708	3.07333
273	1992.58	22.3094	20.8103	23.8838	3.07357
274	1992.61	22.3224	20.8232	23.8971	3.07391
275	1992.63	22.3357	20.8361	23.9105	3.07435
276	1992.66	22.349	20.8492	23.9241	3.07489
277	1992.68	22.3624	20.8623	23.9378	3.07553
278	1992.71	22.376	20.8755	23.9518	3.07626
279	1992.74	22.3897	20.8887	23.9658	3.0771
280	1992.76	22.4035	20.9021	23.9801	3.07805
281	1992.79	22.4174	20.9154	23.9945	3.07909
282	1992.81	22.4314	20.9289	24.0091	3.08024
283	1992.84	22.4455	20.9424	24.0238	3.08149
284	1992.87	22.4598	20.9559	24.0387	3.08285
285	1992.89	22.4741	20.9695	24.0538	3.08431
286	1992.92	22.4885	20.9831	24.069	3.08587
287	1992.94	22.503	20.9968	24.0843	3.08754
288	1992.97	22.5176	21.0105	24.0998	3.08932
289	1993	22.5323	21.0243	24.1154	3.09119
290	1993.02	22.5471	21.038	24.1312	3.09317
291	1993.05	22.5619	21.0519	24.1471	3.09526
292	1993.07	22.5768	21.0657	24.1632	3.09745
293	1993.1	22.5918	21.0796	24.1793	3.09974
294	1993.13	22.6069	21.0935	24.1956	3.10214
295	1993.15	22.6221	21.1074	24.212	3.10464
296	1993.18	22.6373	21.1213	24.2286	3.10724
297	1993.2	22.6525	21.1353	24.2452	3.10994
298	1993.23	22.6679	21.1493	24.262	3.11275
299	1993.26	22.6833	21.1632	24.2789	3.11565
300	1993.28	22.6987	21.1772	24.2959	3.11865
301	1993.31	22.7142	21.1912	24.313	3.12175
302	1993.33	22.7298	21.2052	24.3302	3.12495
303	1993.36	22.7454	21.2192	24.3475	3.12825
304	1993.39	22.7611	21.2332	24.3648	3.13163
305	1993.41	22.7768	21.2472	24.3823	3.13512
306	1993.44	22.7925	21.2612	24.3999	3.13869
307	1993.46	22.8083	21.2752	24.4175	3.14236
308	1993.49	22.824	21.2891	24.4353	3.14611
309	1993.52	22.8399	21.3031	24.4531	3.14995
310	1993.54	22.8557	21.3171	24.4709	3.15388
311	1993.57	22.8716	21.331	24.4889	3.1579
312	1993.59	22.8875	21.3449	24.5069	3.162
313	1993.62	22.9034	21.3588	24.525	3.16617
314	1993.65	22.9194	21.3727	24.5431	3.17043
315	1993.67	22.9353	21.3865	24.5613	3.17477
316	1993.7	22.9513	21.4003	24.5795	3.17918
317	1993.72	22.9673	21.4141	24.5978	3.18366
318	1993.75	22.9832	21.4279	24.6161	3.18822
319	1993.78	22.9992	21.4416	24.6345	3.19285
320	1993.8	23.0152	21.4553	24.6528	3.19754
321	1993.83	23.0311	21.469	24.6713	3.2023
322	1993.85	23.0471	21.4826	24.6897	3.20712
323	1993.88	23.063	21.4962	24.7082	3.212
324	1993.91	23.079	21.5097	24.7266	3.21693
325	1993.93	23.0949	21.5232	24.7451	3.22193
326	1993.96	23.1108	21.5366	24.7636	3.22697
327	1993.98	23.1266	21.5501	24.7821	3.23207
328	1994.01	23.1425	21.5634	24.8006	3.23721
329	1994.04	23.1583	21.5767	24.8191	3.2424
330	1994.06	23.1741	21.59	24.8376	3.24763
331	1994.09	23.1898	21.6032	24.8561	3.2529
332	1994.11	23.2055	21.6163	24.8745	3.2582
333	1994.14	23.2212	21.6294	24.8929	3.26354
334	1994.17	23.2368	21.6424	24.9113	3.26891
335	1994.19	23.2524	21.6554	24.9297	3.27431
336	1994.22	23.2679	21.6683	24.948	3.27974
337	1994.24	23.2834	21.6812	24.9663	3.28518
338	1994.27	23.2988	21.6939	24.9846	3.29065
339	1994.3	23.3142	21.7066	25.0028	3.29613
340	1994.32	23.3295	21.7193	25.0209	3.30162
341	1994.35	23.3447	21.7319	25.039	3.30713
342	1994.37	23.3599	21.7444	25.057	3.31264
343	1994.4	23.375	21.7568	25.0749	3.31815
344	1994.43	23.39	21.7691	25.0928	3.32366
345	1994.45	23.4049	21.7814	25.1106	3.32918
346	1994.48	23.4198	21.7936	25.1283	3.33468
347	1994.51	23.4346	21.8057	25.1459	3.34018
348	1994.53	23.4492	21.8178	25.1634	3.34567
349	1994.56	23.4638	21.8297	25.1809	3.35114
350	1994.58	23.4783	21.8416	25.1982	3.35659
351	1994.61	23.4927	21.8534	25.2154	3.36202
352	1994.64	23.507	21.8651	25.2325	3.36742
353	1994.66	23.5212	21.8767	25.2495	3.37279
354	1994.69	23.5353	21.8882	25.2663	3.37814
355	1994.71	23.5493	21.8996	25.2831	3.38345
356	1994.74	23.5632	21.911	25.2997	3.38872
357	1994.77	23.577	21.9222	25.3161	3.39395
358	1994.79	23.5906	21.9333	25.3325	3.39913
359	1994.82	23.6041	21.9444	25.3486	3.40427
360	1994.84	23.6175	21.9553	25.3647	3.40936
361	1994.87	23.6308	21.9662	25.3805	3.41439
362	1994.9	23.6439	21.9769	25.3963	3.41936
363	1994.92	23.6569	21.9875	25.4118	3.42427
364	1994.95	23.6698	21.998	25.4272	3.42912
365	1994.97	23.6825	22.0085	25.4424	3.4339
366	1995	23.6951	22.0188	25.4574	3.43861
367	1995.03	23.7075	22.029	25.4722	3.44325
368	1995.05	23.7198	22.039	25.4869	3.44781
369	1995.08	23.7319	22.049	25.5013	3.45229
370	1995.1	23.7439	22.0589	25.5155	3.45669
371	1995.13	23.7557	22.0686	25.5296	3.461
372	1995.16	23.7674	22.0782	25.5434	3.46522
373	1995.18	23.7789	22.0877	25.557	3.46935
374	1995.21	23.7902	22.0971	25.5704	3.47339
375	1995.23	23.8013	22.1063	25.5836	3.47732
376	1995.26	23.8123	22.1154	25.5966	3.48116
377	1995.29	23.8231	22.1244	25.6093	3.48489
378	1995.31	23.8337	22.1333	25.6218	3.48852
379	1995.34	23.8441	22.142	25.634	3.49203
380	1995.36	23.8543	22.1506	25.646	3.49543
381	1995.39	23.8644	22.159	25.6577	3.49872
382	1995.42	23.8742	22.1673	25.6692	3.50189
383	1995.44	23.8839	22.1755	25.6804	3.50494
384	1995.47	23.8933	22.1835	25.6914	3.50787
385	1995.49	23.9026	22.1914	25.7021	3.51067
386	1995.52	23.9116	22.1991	25.7125	3.51334
387	1995.55	23.9204	22.2067	25.7226	3.51589
388	1995.57	23.929	22.2142	25.7325	3.5183
389	1995.6	23.9374	22.2215	25.742	3.52057
390	1995.62	23.9456	22.2286	25.7513	3.52271
391	1995.65	23.9535	22.2356	25.7603	3.52471
392	1995.68	23.9613	22.2424	25.769	3.52656
393	1995.7	23.9688	22.2491	25.7773	3.52828
394	1995.73	23.976	22.2555	25.7854	3.52984
395	1995.75	23.983	22.2619	25.7931	3.53126
396	1995.78	23.9898	22.268	25.8006	3.53253
397	1995.81	23.9964	22.274	25.8077	3.53365
398	1995.83	24.0027	22.2798	25.8145	3.53462
399	1995.86	24.0087	22.2855	25.8209	3.53543
400	1995.88	24.0145	22.291	25.827	3.53608
401	1995.91	24.0201	22.2962	25.8328	3.53658
402	1995.94	24.0253	22.3014	25.8383	3.53692
403	1995.96	24.0304	22.3063	25.8434	3.5371
404	1995.99	24.0351	22.311	25.8482	3.53714
405	1996.01	24.0397	22.3156	25.8526	3.53702
406	1996.04	24.0439	22.32	25.8567	3.53675
407	1996.07	24.048	22.3242	25.8605	3.53634
408	1996.09	24.0517	22.3282	25.864	3.53579
409	1996.12	24.0553	22.3321	25.8671	3.53509
410	1996.14	24.0585	22.3357	25.87	3.53426
411	1996.17	24.0616	22.3392	25.8725	3.53329
412	1996.2	24.0644	22.3425	25.8747	3.53219
413	1996.22	24.0669	22.3457	25.8766	3.53097
414	1996.25	24.0693	22.3486	25.8782	3.52961
415	1996.27	24.0714	22.3514	25.8795	3.52813
416	1996.3	24.0732	22.354	25.8805	3.52654
417	1996.33	24.0748	22.3564	25.8813	3.52482
418	1996.35	24.0762	22.3587	25.8817	3.52299
419	1996.38	24.0774	22.3608	25.8818	3.52105
420	1996.4	24.0783	22.3627	25.8817	3.51901
421	1996.43	24.079	22.3644	25.8812	3.51686
422	1996.46	24.0795	22.3659	25.8805	3.5146
423	1996.48	24.0797	22.3673	25.8795	3.51225
424	1996.51	24.0797	22.3685	25.8783	3.50981
425	1996.54	24.0795	22.3695	25.8767	3.50727
426	1996.56	24.0791	22.3703	25.8749	3.50465
427	1996.59	24.0785	22.371	25.8729	3.50194
428	1996.61	24.0776	22.3714	25.8706	3.49915
429	1996.64	24.0766	22.3717	25.868	3.49628
430	1996.67	24.0753	22.3719	25.8652	3.49334
431	1996.69	24.0738	22.3718	25.8621	3.49033
432	1996.72	24.0721	22.3716	25.8588	3.48725
433	1996.74	24.0702	22.3712	25.8553	3.48411
434	1996.77	24.0681	22.3706	25.8515	3.4809
435	1996.8	24.0658	22.3698	25.8475	3.47764
436	1996.82	24.0632	22.3689	25.8432	3.47433
437	1996.85	24.0605	22.3678	25.8387	3.47097
438	1996.87	24.0576	22.3665	25.834	3.46756
439	1996.9	24.0545	22.365	25.8291	3.46411
440	1996.93	24.0512	22.3634	25.824	3.46062
441	1996.95	24.0477	22.3615	25.8186	3.45709
442	1996.98	24.044	22.3595	25.8131	3.45353
443	1997	24.0401	22.3574	25.8073	3.44994
444	1997.03	24.036	22.355	25.8013	3.44633
445	1997.06	24.0317	22.3525	25.7952	3.44269
446	1997.08	24.0272	22.3498	25.7888	3.43904
447	1997.11	24.0226	22.3469	25.7822	3.43537
448	1997.13	24.0178	22.3438	25.7755	3.43169
449	1997.16	24.0128	22.3406	25.7686	3.428
450	1997.19	24.0076	22.3371	25.7615	3.4243
451	1997.21	24.0022	22.3336	25.7542	3.42061
452	1997.24	23.9966	22.3298	25.7467	3.41691
453	1997.26	23.9909	22.3258	25.7391	3.41322
454	1997.29	23.985	22.3217	25.7312	3.40954
455	1997.32	23.979	22.3174	25.7233	3.40587
456	1997.34	23.9727	22.3129	25.7151	3.40222
457	1997.37	23.9663	22.3083	25.7069	3.39858
458	1997.39	23.9598	22.3034	25.6984	3.39496
459	1997.42	23.953	22.2984	25.6898	3.39136
460	1997.45	23.9461	22.2933	25.6811	3.3878
461	1997.47	23.9391	22.2879	25.6722	3.38426
462	1997.5	23.9319	22.2824	25.6631	3.38075
463	1997.52	23.9245	22.2767	25.654	3.37728
464	1997.55	23.917	22.2708	25.6446	3.37385
465	1997.58	23.9093	22.2647	25.6352	3.37045
466	1997.6	23.9014	22.2585	25.6256	3.3671
467	1997.63	23.8934	22.2521	25.6159	3.3638
468	1997.65	23.8853	22.2456	25.6061	3.36054
469	1997.68	23.877	22.2388	25.5962	3.35734
470	1997.71	23.8686	22.2319	25.5861	3.35418
471	1997.73	23.86	22.2248	25.5759	3.35109
472	1997.76	23.8513	22.2176	25.5656	3.34805
473	1997.78	23.8424	22.2102	25.5552	3.34507
474	1997.81	23.8334	22.2026	25.5447	3.34215
475	1997.84	23.8243	22.1948	25.5341	3.3393
476	1997.86	23.815	22.1869	25.5234	3.33651
477	1997.89	23.8056	22.1788	25.5126	3.33379
478	1997.91	23.7961	22.1706	25.5017	3.33115
479	1997.94	23.7864	22.1621	25.4907	3.32857
480	1997.97	23.7766	22.1536	25.4796	3.32607
481	1997.99	23.7667	22.1448	25.4684	3.32364
482	1998.02	23.7566	22.1359	25.4572	3.32129
483	1998.04	23.7464	22.1268	25.4458	3.31901
484	1998.07	23.7361	22.1176	25.4344	3.31682
485	1998.1	23.7257	22.1082	25.4229	3.3147
486	1998.12	23.7152	22.0987	25.4113	3.31267
487	1998.15	23.7045	22.089	25.3997	3.31072
488	1998.17	23.6938	22.0791	25.388	3.30885
489	1998.2	23.6829	22.0691	25.3762	3.30707
490	1998.23	23.6719	22.059	25.3643	3.30537
491	1998.25	23.6608	22.0487	25.3524	3.30376
492	1998.28	23.6495	22.0382	25.3404	3.30223
493	1998.3	23.6382	22.0276	25.3284	3.3008
494	1998.33	23.6268	22.0168	25.3163	3.29945
495	1998.36	23.6153	22.0059	25.3041	3.29819
496	1998.38	23.6036	21.9949	25.2919	3.29702
497	1998.41	23.5919	21.9837	25.2796	3.29593
498	1998.43	23.5801	21.9724	25.2673	3.29494
499	1998.46	23.5681	21.9609	25.2549	3.29403
500	1998.49	23.5561	21.9493	25.2425	3.29322
501	1998.51	23.544	21.9376	25.23	3.29249
502	1998.54	23.5318	21.9257	25.2175	3.29185
503	1998.57	23.5195	21.9137	25.205	3.2913
504	1998.59	23.5071	21.9015	25.1924	3.29083
505	1998.62	23.4946	21.8893	25.1797	3.29045
506	1998.64	23.4821	21.8769	25.1671	3.29016
507	1998.67	23.4694	21.8644	25.1543	3.28996
508	1998.7	23.4567	21.8517	25.1416	3.28984
509	1998.72	23.4439	21.839	25.1288	3.2898
510	1998.75	23.431	21.8261	25.116	3.28985
511	1998.77	23.418	21.8131	25.1031	3.28998
512	1998.8	23.405	21.8	25.0902	3.29019
513	1998.83	23.3919	21.7868	25.0773	3.29048
514	1998.85	23.3787	21.7735	25.0644	3.29085
515	1998.88	23.3655	21.7601	25.0514	3.2913
516	1998.9	23.3521	21.7465	25.0384	3.29183
517	1998.93	23.3388	21.7329	25.0253	3.29243
518	1998.96	23.3253	21.7192	25.0123	3.2931
519	1998.98	23.3118	21.7053	24.9992	3.29384
520	1999.01	23.2982	21.6914	24.9861	3.29465
521	1999.03	23.2846	21.6774	24.9729	3.29553
522	1999.06	23.2709	21.6633	24.9598	3.29648
523	1999.09	23.2571	21.6491	24.9466	3.29749
524	1999.11	23.2433	21.6348	24.9334	3.29857
525	1999.14	23.2295	21.6204	24.9201	3.2997
526	1999.16	23.2155	21.606	24.9069	3.3009
527	1999.19	23.2016	21.5915	24.8936	3.30214
528	1999.22	23.1876	21.5769	24.8803	3.30345
529	1999.24	23.1735	21.5622	24.867	3.3048
530	1999.27	23.1594	21.5475	24.8537	3.30621
531	1999.29	23.1453	21.5327	24.8404	3.30766
532	1999.32	23.1311	21.5178	24.827	3.30916
533	1999.35	23.1168	21.5029	24.8136	3.3107
534	1999.37	23.1026	21.4879	24.8002	3.31228
535	1999.4	23.0883	21.4729	24.7868	3.3139
536	1999.42	23.0739	21.4578	24.7734	3.31555
537	1999.45	23.0595	21.4427	24.7599	3.31724
538	1999.48	23.0451	21.4275	24.7464	3.31895
539	1999.5	23.0307	21.4123	24.7329	3.3207
540	1999.53	23.0162	21.397	24.7194	3.32246
541	1999.55	23.0017	21.3817	24.7059	3.32425
542	1999.58	22.9872	21.3663	24.6924	3.32606
543	1999.61	22.9726	21.351	24.6789	3.32789
544	1999.63	22.9581	21.3356	24.6653	3.32972
545	1999.66	22.9435	21.3201	24.6517	3.33157
546	1999.68	22.9289	21.3047	24.6381	3.33343
547	1999.71	22.9142	21.2892	24.6245	3.3353
548	1999.74	22.8996	21.2737	24.6109	3.33716
549	1999.76	22.8849	21.2582	24.5972	3.33903
550	1999.79	22.8703	21.2427	24.5836	3.34089
551	1999.81	22.8556	21.2272	24.5699	3.34275
552	1999.84	22.8409	21.2116	24.5562	3.3446
553	1999.87	22.8262	21.1961	24.5425	3.34643
554	1999.89	22.8114	21.1806	24.5288	3.34825
555	1999.92	22.7967	21.165	24.5151	3.35006
556	1999.94	22.782	21.1495	24.5014	3.35184
557	1999.97	22.7673	21.134	24.4876	3.3536
558	2000	22.7526	21.1185	24.4738	3.35533
559	2000.02	22.7378	21.103	24.46	3.35704
560	2000.05	22.7231	21.0875	24.4462	3.35871
561	2000.07	22.7084	21.0721	24.4324	3.36035
562	2000.1	22.6937	21.0566	24.4186	3.36195
563	2000.13	22.679	21.0412	24.4047	3.36351
564	2000.15	22.6643	21.0259	24.3909	3.36503
565	2000.18	22.6496	21.0105	24.377	3.3665
566	2000.2	22.6349	20.9952	24.3631	3.36792
567	2000.23	22.6202	20.9799	24.3492	3.3693
568	2000.26	22.6056	20.9647	24.3353	3.37061
569	2000.28	22.5909	20.9495	24.3214	3.37187
570	2000.31	22.5763	20.9344	24.3075	3.37307
571	2000.33	22.5617	20.9193	24.2935	3.37421
572	2000.36	22.5471	20.9042	24.2795	3.37529
573	2000.39	22.5326	20.8893	24.2655	3.37629
574	2000.41	22.5181	20.8743	24.2516	3.37723
575	2000.44	22.5035	20.8594	24.2375	3.3781
576	2000.46	22.4891	20.8446	24.2235	3.37889
577	2000.49	22.4746	20.8299	24.2095	3.3796
578	2000.52	22.4602	20.8152	24.1954	3.38023
579	2000.54	22.4458	20.8006	24.1814	3.38078
580	2000.57	22.4314	20.7861	24.1673	3.38125
581	2000.6	22.4171	20.7716	24.1532	3.38163
582	2000.62	22.4028	20.7572	24.1391	3.38193
583	2000.65	22.3886	20.7429	24.125	3.38213
584	2000.67	22.3743	20.7287	24.1109	3.38224
585	2000.7	22.3602	20.7145	24.0968	3.38225
586	2000.73	22.346	20.7005	24.0827	3.38217
587	2000.75	22.3319	20.6865	24.0685	3.38199
588	2000.78	22.3179	20.6727	24.0544	3.38171
589	2000.8	22.3039	20.6589	24.0402	3.38132
590	2000.83	22.2899	20.6452	24.026	3.38083
591	2000.86	22.276	20.6316	24.0119	3.38024
592	2000.88	22.2622	20.6182	23.9977	3.37954
593	2000.91	22.2484	20.6048	23.9835	3.37873
594	2000.93	22.2346	20.5915	23.9693	3.3778
595	2000.96	22.2209	20.5783	23.9551	3.37677
596	2000.99	22.2073	20.5653	23.9409	3.37562
597	2001.01	22.1937	20.5523	23.9267	3.37436
598	2001.04	22.1802	20.5395	23.9125	3.37299
599	2001.06	22.1667	20.5268	23.8983	3.3715
600	2001.09	22.1533	20.5142	23.8841	3.36989
601	2001.12	22.14	20.5017	23.8699	3.36816
602	2001.14	22.1267	20.4894	23.8557	3.36631
603	2001.17	22.1135	20.4771	23.8415	3.36435
604	2001.19	22.1004	20.465	23.8273	3.36228
605	2001.22	22.0873	20.453	23.8131	3.36009
606	2001.25	22.0742	20.4411	23.7989	3.35779
607	2001.27	22.0613	20.4293	23.7847	3.35539
608	2001.3	22.0483	20.4176	23.7705	3.35289
609	2001.32	22.0355	20.406	23.7563	3.35028
610	2001.35	22.0227	20.3945	23.7421	3.34757
611	2001.38	22.0099	20.3831	23.7279	3.34476
612	2001.4	21.9972	20.3718	23.7137	3.34186
613	2001.43	21.9845	20.3606	23.6995	3.33887
614	2001.45	21.9719	20.3495	23.6853	3.33579
615	2001.48	21.9594	20.3384	23.6711	3.33262
616	2001.51	21.9468	20.3275	23.6569	3.32937
617	2001.53	21.9344	20.3166	23.6427	3.32603
618	2001.56	21.9219	20.3059	23.6285	3.32262
619	2001.58	21.9096	20.2952	23.6143	3.31914
620	2001.61	21.8972	20.2845	23.6001	3.31558
621	2001.64	21.8849	20.274	23.586	3.31195
622	2001.66	21.8726	20.2635	23.5718	3.30825
623	2001.69	21.8604	20.2531	23.5576	3.3045
624	2001.71	21.8482	20.2428	23.5434	3.30068
625	2001.74	21.8361	20.2325	23.5293	3.2968
626	2001.77	21.824	20.2223	23.5151	3.29287
627	2001.79	21.8119	20.2121	23.501	3.28889
628	2001.82	21.7998	20.202	23.4869	3.28486
629	2001.84	21.7878	20.1919	23.4727	3.28079
630	2001.87	21.7758	20.1819	23.4586	3.27668
631	2001.9	21.7639	20.172	23.4445	3.27252
632	2001.92	21.7519	20.162	23.4304	3.26834
633	2001.95	21.74	20.1522	23.4163	3.26412
634	2001.97	21.7281	20.1423	23.4022	3.25987
635	2002	21.7163	20.1325	23.3881	3.2556
636	2002.03	21.7044	20.1228	23.3741	3.2513
637	2002.05	21.6926	20.113	23.36	3.24699
638	2002.08	21.6808	20.1033	23.346	3.24266
639	2002.1	21.6691	20.0936	23.332	3.23832
640	2002.13	21.6573	20.084	23.3179	3.23396
641	2002.16	21.6456	20.0743	23.304	3.22961
642	2002.18	21.6339	20.0647	23.29	3.22525
643	2002.21	21.6222	20.0551	23.276	3.22089
644	2002.23	21.6105	20.0455	23.2621	3.21654
645	2002.26	21.5988	20.0359	23.2481	3.21219
646	2002.29	21.5871	20.0264	23.2342	3.20786
647	2002.31	21.5755	20.0168	23.2203	3.20353
648	2002.34	21.5638	20.0072	23.2064	3.19923
649	2002.36	21.5522	19.9976	23.1926	3.19494
650	2002.39	21.5406	19.9881	23.1787	3.19068
651	2002.42	21.529	19.9785	23.1649	3.18644
652	2002.44	21.5173	19.9689	23.1511	3.18223
653	2002.47	21.5057	19.9593	23.1373	3.17806
654	2002.49	21.4941	19.9497	23.1236	3.17392
655	2002.52	21.4825	19.94	23.1099	3.16982
656	2002.55	21.4709	19.9304	23.0961	3.16576
657	2002.57	21.4593	19.9207	23.0825	3.16174
658	2002.6	21.4477	19.911	23.0688	3.15777
659	2002.63	21.4361	19.9013	23.0551	3.15385
660	2002.65	21.4245	19.8915	23.0415	3.14998
661	2002.68	21.4128	19.8818	23.0279	3.14617
662	2002.7	21.4012	19.8719	23.0144	3.14242
663	2002.73	21.3896	19.8621	23.0008	3.13872
664	2002.76	21.3779	19.8522	22.9873	3.13509
665	2002.78	21.3663	19.8423	22.9738	3.13153
666	2002.81	21.3546	19.8323	22.9603	3.12803
667	2002.83	21.343	19.8223	22.9469	3.1246
668	2002.86	21.3313	19.8122	22.9335	3.12125
669	2002.89	21.3196	19.8021	22.9201	3.11797
670	2002.91	21.3079	19.792	22.9067	3.11477
671	2002.94	21.2961	19.7817	22.8934	3.11165
672	2002.96	21.2844	19.7715	22.8801	3.10861
673	2002.99	21.2726	19.7611	22.8668	3.10565
674	2003.02	21.2608	19.7507	22.8535	3.10278
675	2003.04	21.249	19.7403	22.8403	3.1
676	2003.07	21.2372	19.7298	22.8271	3.0973
677	2003.09	21.2254	19.7192	22.8139	3.0947
678	2003.12	21.2135	19.7086	22.8008	3.09219
679	2003.15	21.2016	19.6978	22.7876	3.08977
680	2003.17	21.1897	19.6871	22.7745	3.08745
681	2003.2	21.1778	19.6762	22.7614	3.08523
682	2003.22	21.1658	19.6653	22.7484	3.0831
683	2003.25	21.1538	19.6543	22.7353	3.08108
684	2003.28	21.1418	19.6432	22.7223	3.07915
685	2003.3	21.1297	19.632	22.7094	3.07733
686	2003.33	21.1176	19.6208	22.6964	3.07561
687	2003.35	21.1055	19.6095	22.6834	3.07399
688	2003.38	21.0933	19.5981	22.6705	3.07248
689	2003.41	21.0811	19.5866	22.6576	3.07107
690	2003.43	21.0689	19.575	22.6448	3.06977
691	2003.46	21.0566	19.5633	22.6319	3.06857
692	2003.48	21.0443	19.5516	22.6191	3.06749
693	2003.51	21.032	19.5397	22.6062	3.0665
694	2003.54	21.0196	19.5278	22.5934	3.06563
695	2003.56	21.0072	19.5158	22.5806	3.06486
696	2003.59	20.9947	19.5036	22.5679	3.0642
697	2003.61	20.9822	19.4914	22.5551	3.06365
698	2003.64	20.9697	19.4791	22.5423	3.06321
699	2003.67	20.9571	19.4667	22.5296	3.06287
700	2003.69	20.9444	19.4542	22.5169	3.06264
701	2003.72	20.9317	19.4416	22.5042	3.06252
702	2003.74	20.919	19.4289	22.4914	3.0625
703	2003.77	20.9062	19.4161	22.4787	3.06259
704	2003.8	20.8934	19.4033	22.466	3.06278
705	2003.82	20.8805	19.3903	22.4533	3.06308
706	2003.85	20.8675	19.3772	22.4406	3.06348
707	2003.87	20.8545	19.364	22.428	3.06399
708	2003.9	20.8415	19.3507	22.4153	3.06459
709	2003.93	20.8284	19.3373	22.4026	3.06529
710	2003.95	20.8152	19.3238	22.3899	3.06609
711	2003.98	20.802	19.3102	22.3772	3.06699
712	2004	20.7887	19.2965	22.3644	3.06799
713	2004.03	20.7754	19.2826	22.3517	3.06908
714	2004.06	20.762	19.2687	22.339	3.07027
715	2004.08	20.7486	19.2547	22.3263	3.07154
716	2004.11	20.735	19.2406	22.3135	3.07291
717	2004.13	20.7215	19.2264	22.3007	3.07436
718	2004.16	20.7078	19.212	22.2879	3.0759
719	2004.19	20.6941	19.1976	22.2751	3.07753
720	2004.21	20.6803	19.183	22.2623	3.07924
721	2004.24	20.6665	19.1684	22.2494	3.08103
722	2004.26	20.6526	19.1536	22.2365	3.08289
723	2004.29	20.6386	19.1388	22.2236	3.08483
724	2004.32	20.6245	19.1238	22.2107	3.08685
725	2004.34	20.6104	19.1087	22.1977	3.08894
726	2004.37	20.5962	19.0936	22.1847	3.0911
727	2004.39	20.5819	19.0783	22.1716	3.09332
728	2004.42	20.5676	19.0629	22.1585	3.09561
729	2004.45	20.5532	19.0474	22.1454	3.09796
730	2004.47	20.5387	19.0318	22.1322	3.10037
731	2004.5	20.5241	19.0162	22.119	3.10284
732	2004.53	20.5095	19.0004	22.1057	3.10536
733	2004.55	20.4947	18.9845	22.0924	3.10793
734	2004.58	20.4799	18.9685	22.079	3.11055
735	2004.6	20.4651	18.9524	22.0656	3.11321
736	2004.63	20.4501	18.9362	22.0521	3.11592
737	2004.66	20.435	18.9199	22.0386	3.11867
738	2004.68	20.4199	18.9035	22.0249	3.12145
739	2004.71	20.4047	18.887	22.0113	3.12427
740	2004.73	20.3894	18.8704	21.9975	3.12712
741	2004.76	20.374	18.8537	21.9837	3.13
742	2004.79	20.3585	18.8369	21.9698	3.1329
743	2004.81	20.343	18.82	21.9558	3.13583
744	2004.84	20.3273	18.803	21.9418	3.13877
745	2004.86	20.3116	18.7859	21.9277	3.14173
746	2004.89	20.2958	18.7688	21.9135	3.1447
747	2004.92	20.2798	18.7515	21.8992	3.14768
748	2004.94	20.2638	18.7341	21.8848	3.15067
749	2004.97	20.2477	18.7167	21.8703	3.15366
750	2004.99	20.2315	18.6991	21.8557	3.15665
751	2005.02	20.2152	18.6814	21.8411	3.15964
752	2005.05	20.1988	18.6637	21.8263	3.16262
753	2005.07	20.1823	18.6459	21.8115	3.16559
754	2005.1	20.1657	18.6279	21.7965	3.16855
755	2005.12	20.1491	18.6099	21.7814	3.17149
756	2005.15	20.1323	18.5918	21.7662	3.17442
757	2005.18	20.1154	18.5736	21.751	3.17732
758	2005.2	20.0984	18.5554	21.7356	3.18019
759	2005.23	20.0813	18.537	21.72	3.18304
760	2005.25	20.0641	18.5185	21.7044	3.18586
761	2005.28	20.0469	18.5	21.6886	3.18864
762	2005.31	20.0295	18.4814	21.6727	3.19138
763	2005.33	20.012	18.4627	21.6567	3.19409
764	2005.36	19.9943	18.4439	21.6406	3.19675
765	2005.38	19.9766	18.425	21.6243	3.19936
766	2005.41	19.9588	18.406	21.6079	3.20192
767	2005.44	19.9409	18.387	21.5914	3.20443
768	2005.46	19.9228	18.3678	21.5747	3.20689
769	2005.49	19.9047	18.3486	21.5579	3.20928
770	2005.51	19.8864	18.3293	21.5409	3.21161
771	2005.54	19.8681	18.31	21.5238	3.21388
772	2005.57	19.8496	18.2905	21.5066	3.21608
773	2005.59	19.831	18.271	21.4892	3.21821
774	2005.62	19.8123	18.2514	21.4716	3.22027
775	2005.64	19.7935	18.2317	21.4539	3.22225
776	2005.67	19.7745	18.2119	21.4361	3.22415
777	2005.7	19.7555	18.1921	21.418	3.22597
778	2005.72	19.7363	18.1721	21.3998	3.22771
779	2005.75	19.717	18.1521	21.3815	3.22936
780	2005.77	19.6976	18.1321	21.363	3.23093
781	2005.8	19.6781	18.1119	21.3443	3.2324
782	2005.83	19.6584	18.0917	21.3255	3.23378
783	2005.85	19.6386	18.0714	21.3064	3.23506
784	2005.88	19.6187	18.051	21.2873	3.23624
785	2005.9	19.5987	18.0306	21.2679	3.23733
786	2005.93	19.5786	18.01	21.2483	3.23831
787	2005.96	19.5583	17.9894	21.2286	3.23918
788	2005.98	19.5379	17.9688	21.2087	3.23995
789	2006.01	19.5174	17.948	21.1886	3.24062
790	2006.03	19.4968	17.9272	21.1684	3.24117
791	2006.06	19.476	17.9063	21.1479	3.2416
792	2006.09	19.4552	17.8854	21.1273	3.24193
793	2006.11	19.4341	17.8643	21.1065	3.24214
794	2006.14	19.413	17.8432	21.0854	3.24222
795	2006.16	19.3917	17.822	21.0642	3.2422
796	2006.19	19.3703	17.8008	21.0428	3.24205
797	2006.22	19.3488	17.7794	21.0212	3.24177
798	2006.24	19.3271	17.758	20.9994	3.24138
799	2006.27	19.3053	17.7366	20.9774	3.24086
800	2006.29	19.2834	17.715	20.9552	3.24022
801	2006.32	19.2613	17.6934	20.9329	3.23944
802	2006.35	19.2391	17.6717	20.9103	3.23855
803	2006.37	19.2168	17.65	20.8875	3.23753
804	2006.4	19.1944	17.6281	20.8645	3.23638
805	2006.42	19.1718	17.6062	20.8413	3.23512
806	2006.45	19.1491	17.5842	20.818	3.23374
807	2006.48	19.1262	17.5622	20.7944	3.23224
808	2006.5	19.1033	17.5401	20.7707	3.23063
809	2006.53	19.0802	17.5179	20.7468	3.2289
810	2006.56	19.057	17.4956	20.7227	3.22707
811	2006.58	19.0336	17.4733	20.6984	3.22513
812	2006.61	19.0102	17.4508	20.6739	3.22308
813	2006.63	18.9866	17.4284	20.6493	3.22093
814	2006.66	18.9629	17.4058	20.6245	3.21868
815	2006.69	18.9391	17.3832	20.5995	3.21633
816	2006.71	18.9152	17.3605	20.5744	3.21389
817	2006.74	18.8911	17.3377	20.5491	3.21135
818	2006.76	18.867	17.3149	20.5236	3.20873
819	2006.79	18.8427	17.292	20.498	3.20602
820	2006.82	18.8183	17.269	20.4723	3.20322
821	2006.84	18.7939	17.246	20.4463	3.20035
822	2006.87	18.7693	17.2229	20.4202	3.19739
823	2006.89	18.7446	17.1997	20.394	3.19436
824	2006.92	18.7197	17.1764	20.3677	3.19126
825	2006.95	18.6948	17.1531	20.3411	3.1881
826	2006.97	18.6698	17.1296	20.3145	3.18486
827	2007	18.6447	17.1061	20.2877	3.18156
828	2007.02	18.6194	17.0826	20.2608	3.17821
829	2007.05	18.5941	17.0589	20.2337	3.1748
830	2007.08	18.5687	17.0352	20.2066	3.17134
831	2007.1	18.5432	17.0114	20.1793	3.16783
832	2007.13	18.5175	16.9876	20.1518	3.16427
833	2007.15	18.4918	16.9636	20.1243	3.16067
834	2007.18	18.466	16.9396	20.0966	3.15704
835	2007.21	18.4401	16.9155	20.0689	3.15336
836	2007.23	18.4141	16.8913	20.041	3.14966
837	2007.26	18.388	16.8671	20.013	3.14593
838	2007.28	18.3618	16.8427	19.9849	3.14218
839	2007.31	18.3355	16.8183	19.9567	3.13841
840	2007.34	18.3091	16.7938	19.9284	3.13462
841	2007.36	18.2827	16.7692	19.9001	3.13082
842	2007.39	18.2561	16.7446	19.8716	3.12701
843	2007.41	18.2295	16.7198	19.843	3.1232
844	2007.44	18.2028	16.695	19.8144	3.11938
845	2007.47	18.176	16.6701	19.7857	3.11557
846	2007.49	18.1491	16.6451	19.7569	3.11176
847	2007.52	18.1222	16.62	19.728	3.10797
848	2007.54	18.0951	16.5949	19.699	3.10419
849	2007.57	18.068	16.5696	19.67	3.10043
850	2007.6	18.0408	16.5443	19.6409	3.09669
851	2007.62	18.0136	16.5188	19.6118	3.09297
852	2007.65	17.9862	16.4933	19.5826	3.08929
853	2007.67	17.9588	16.4677	19.5533	3.08564
854	2007.7	17.9313	16.442	19.524	3.08203
855	2007.73	17.9037	16.4162	19.4946	3.07846
856	2007.75	17.8761	16.3903	19.4652	3.07494
857	2007.78	17.8484	16.3643	19.4358	3.07146
858	2007.8	17.8206	16.3382	19.4063	3.06805
859	2007.83	17.7928	16.3121	19.3768	3.06468
860	2007.86	17.7649	16.2858	19.3472	3.06138
861	2007.88	17.7369	16.2595	19.3176	3.05815
862	2007.91	17.7088	16.233	19.288	3.05498
863	2007.93	17.6807	16.2064	19.2583	3.05189
864	2007.96	17.6526	16.1798	19.2287	3.04887
865	2007.99	17.6243	16.153	19.199	3.04594
866	2008.01	17.5961	16.1262	19.1693	3.04308
867	2008.04	17.5677	16.0992	19.1396	3.04032
868	2008.06	17.5393	16.0722	19.1098	3.03765
869	2008.09	17.5108	16.045	19.0801	3.03508
870	2008.12	17.4823	16.0178	19.0504	3.0326
871	2008.14	17.4537	15.9904	19.0207	3.03023
872	2008.17	17.4251	15.963	18.9909	3.02796
873	2008.19	17.3964	15.9354	18.9612	3.0258
874	2008.22	17.3677	15.9077	18.9315	3.02376
875	2008.25	17.3389	15.88	18.9018	3.02183
876	2008.27	17.3101	15.8521	18.8721	3.02002
877	2008.3	17.2812	15.8241	18.8424	3.01834
878	2008.32	17.2523	15.796	18.8128	3.01678
879	2008.35	17.2233	15.7678	18.7832	3.01536
880	2008.38	17.1943	15.7395	18.7536	3.01406
881	2008.4	17.1652	15.7111	18.724	3.01291
882	2008.43	17.1361	15.6826	18.6944	3.01189
883	2008.45	17.1069	15.6539	18.6649	3.01101
884	2008.48	17.0777	15.6252	18.6355	3.01028
885	2008.51	17.0485	15.5963	18.606	3.0097
886	2008.53	17.0192	15.5674	18.5766	3.00927
887	2008.56	16.9899	15.5383	18.5473	3.00899
888	2008.59	16.9605	15.5091	18.518	3.00886
889	2008.61	16.9311	15.4798	18.4887	3.0089
890	2008.64	16.9017	15.4504	18.4595	3.00909
891	2008.66	16.8723	15.4209	18.4304	3.00945
892	2008.69	16.8428	15.3913	18.4013	3.00997
893	2008.72	16.8132	15.3616	18.3723	3.01066
894	2008.74	16.7837	15.3318	18.3433	3.01152
895	2008.77	16.7541	15.3018	18.3144	3.01256
896	2008.79	16.7245	15.2718	18.2855	3.01376
897	2008.82	16.6948	15.2416	18.2567	3.01514
898	2008.85	16.6651	15.2113	18.228	3.0167
899	2008.87	16.6354	15.1809	18.1994	3.01844
900	2008.9	16.6057	15.1504	18.1708	3.02035
901	2008.92	16.5759	15.1198	18.1423	3.02245
902	2008.95	16.5462	15.0891	18.1139	3.02473
903	2008.98	16.5163	15.0583	18.0855	3.02719
904	2009	16.4865	15.0274	18.0572	3.02984
905	2009.03	16.4567	14.9964	18.029	3.03268
906	2009.05	16.4268	14.9652	18.0009	3.0357
907	2009.08	16.3969	14.934	17.9729	3.03891
908	2009.11	16.367	14.9026	17.9449	3.04231
909	2009.13	16.3371	14.8712	17.9171	3.0459
910	2009.16	16.3071	14.8396	17.8893	3.04968
911	2009.18	16.2772	14.808	17.8616	3.05364
912	2009.21	16.2472	14.7762	17.834	3.0578
913	2009.24	16.2172	14.7444	17.8065	3.06215
914	2009.26	16.1872	14.7124	17.7791	3.06669
915	2009.29	16.1572	14.6803	17.7518	3.07142
916	2009.31	16.1272	14.6482	17.7245	3.07634
917	2009.34	16.0972	14.6159	17.6974	3.08145
918	2009.37	16.0671	14.5836	17.6703	3.08675
919	2009.39	16.0371	14.5511	17.6434	3.09225
920	2009.42	16.007	14.5186	17.6165	3.09793
921	2009.44	15.9769	14.486	17.5898	3.1038
922	2009.47	15.9469	14.4533	17.5631	3.10985
923	2009.5	15.9168	14.4205	17.5366	3.1161
924	2009.52	15.8867	14.3876	17.5101	3.12253
925	2009.55	15.8566	14.3546	17.4837	3.12915
926	2009.57	15.8265	14.3215	17.4575	3.13596
927	2009.6	15.7964	14.2884	17.4313	3.14294
928	2009.63	15.7664	14.2551	17.4053	3.15011
929	2009.65	15.7363	14.2218	17.3793	3.15746
930	2009.68	15.7062	14.1884	17.3534	3.16499
931	2009.7	15.6761	14.155	17.3277	3.17271
932	2009.73	15.646	14.1214	17.302	3.18059
933	2009.76	15.6159	14.0878	17.2765	3.18866
934	2009.78	15.5858	14.0541	17.251	3.19689
935	2009.81	15.5558	14.0203	17.2256	3.2053
936	2009.83	15.5257	13.9865	17.2004	3.21389
937	2009.86	15.4956	13.9526	17.1752	3.22264
938	2009.89	15.4656	13.9186	17.1502	3.23156
939	2009.91	15.4355	13.8846	17.1252	3.24064
940	2009.94	15.4055	13.8505	17.1004	3.24989
941	2009.96	15.3755	13.8163	17.0756	3.25929
942	2009.99	15.3454	13.7821	17.051	3.26886
943	2010.02	15.3154	13.7479	17.0264	3.27859
944	2010.04	15.2854	13.7135	17.002	3.28847
945	2010.07	15.2554	13.6791	16.9777	3.2985
946	2010.09	15.2255	13.6447	16.9534	3.30869
947	2010.12	15.1955	13.6102	16.9293	3.31902
948	2010.15	15.1656	13.5757	16.9052	3.3295
949	2010.17	15.1357	13.5411	16.8813	3.34013
950	2010.2	15.1057	13.5065	16.8574	3.35089
951	2010.22	15.0759	13.4719	16.8337	3.3618
952	2010.25	15.046	13.4372	16.81	3.37284
953	2010.28	15.0161	13.4024	16.7864	3.38402
954	2010.3	14.9863	13.3677	16.763	3.39532
955	2010.33	14.9565	13.3329	16.7396	3.40676
956	2010.35	14.9267	13.298	16.7163	3.41832
957	2010.38	14.8969	13.2632	16.6932	3.43001
958	2010.41	14.8672	13.2283	16.6701	3.44182
959	2010.43	14.8374	13.1934	16.6471	3.45375
960	2010.46	14.8077	13.1584	16.6242	3.4658
961	2010.48	14.7781	13.1234	16.6014	3.47796
962	2010.51	14.7484	13.0885	16.5787	3.49023
963	2010.54	14.7188	13.0535	16.5561	3.50261
964	2010.56	14.6892	13.0184	16.5335	3.5151
965	2010.59	14.6596	12.9834	16.5111	3.52769
966	2010.62	14.6301	12.9484	16.4888	3.54038
967	2010.64	14.6005	12.9133	16.4665	3.55317
968	2010.67	14.571	12.8783	16.4443	3.56606
969	2010.69	14.5416	12.8432	16.4222	3.57903
970	2010.72	14.5122	12.8081	16.4002	3.5921
971	2010.75	14.4828	12.7731	16.3783	3.60526
972	2010.77	14.4534	12.738	16.3565	3.6185
973	2010.8	14.4241	12.7029	16.3348	3.63182
974	2010.82	14.3948	12.6679	16.3131	3.64523
975	2010.85	14.3655	12.6328	16.2915	3.65871
976	2010.88	14.3363	12.5978	16.27	3.67227
977	2010.9	14.3071	12.5627	16.2486	3.68589
978	2010.93	14.2779	12.5277	16.2273	3.69959
979	2010.95	14.2488	12.4927	16.206	3.71336
980	2010.98	14.2197	12.4577	16.1849	3.72719
981	2011.01	14.1907	12.4227	16.1638	3.74108
982	2011.03	14.1617	12.3877	16.1428	3.75503
983	2011.06	14.1327	12.3528	16.1218	3.76903
984	2011.08	14.1037	12.3179	16.101	3.7831
985	2011.11	14.0749	12.283	16.0802	3.79721
986	2011.14	14.046	12.2481	16.0595	3.81137
987	2011.16	14.0172	12.2133	16.0389	3.82558
988	2011.19	13.9884	12.1785	16.0183	3.83984
989	2011.21	13.9597	12.1437	15.9978	3.85413
990	2011.24	13.931	12.109	15.9774	3.86847
991	2011.27	13.9024	12.0742	15.9571	3.88284
992	2011.29	13.8738	12.0396	15.9368	3.89725
993	2011.32	13.8452	12.0049	15.9166	3.91169
994	2011.34	13.8167	11.9703	15.8965	3.92617
995	2011.37	13.7883	11.9358	15.8764	3.94067
996	2011.4	13.7599	11.9013	15.8565	3.95519
997	2011.42	13.7315	11.8668	15.8365	3.96974
998	2011.45	13.7032	11.8324	15.8167	3.98431
999	2011.47	13.6749	11.798	15.7969	3.9989
1000	2011.5	13.6467	11.7637	15.7772	4.0135
