# Supplementary material for: A Stochastic Method for Predicting Recovery of Coral Reefs
Source: Research Square preprint supplement (doi:10.21203/rs.3.rs-7310681/v1), 2025-11-07
Supplement: Supplementary file 3 [file coralcover.xlsx]

## Sheet: Sheet1
time	percent
1	27.2944		1985.5
2	27.2526		1985.53
3	27.2109		1985.55
4	27.1693		1985.58
5	27.1277		1985.6
6	27.0861		1985.63
7	27.0446		1985.66
8	27.0031		1985.68
9	26.9617		1985.71
10	26.9204		1985.73
11	26.8791		1985.76
12	26.8378		1985.79
13	26.7966		1985.81
14	26.7555		1985.84
15	26.7145		1985.86
16	26.6735		1985.89
17	26.6326		1985.92
18	26.5917		1985.94
19	26.551		1985.97
20	26.5103		1985.99
21	26.4696		1986.02
22	26.4291		1986.05
23	26.3886		1986.07
24	26.3482		1986.1
25	26.3079		1986.12
26	26.2677		1986.15
27	26.2276		1986.18
28	26.1875		1986.2
29	26.1475		1986.23
30	26.1077		1986.25
31	26.0679		1986.28
32	26.0282		1986.31
33	25.9886		1986.33
34	25.9491		1986.36
35	25.9098		1986.38
36	25.8705		1986.41
37	25.8313		1986.44
38	25.7922		1986.46
39	25.7532		1986.49
40	25.7144		1986.52
41	25.6756		1986.54
42	25.637		1986.57
43	25.5984		1986.59
44	25.56		1986.62
45	25.5217		1986.65
46	25.4835		1986.67
47	25.4455		1986.7
48	25.4075		1986.72
49	25.3697		1986.75
50	25.332		1986.78
51	25.2945		1986.8
52	25.257		1986.83
53	25.2197		1986.85
54	25.1825		1986.88
55	25.1455		1986.91
56	25.1085		1986.93
57	25.0718		1986.96
58	25.0351		1986.98
59	24.9986		1987.01
60	24.9622		1987.04
61	24.926		1987.06
62	24.8899		1987.09
63	24.854		1987.11
64	24.8182		1987.14
65	24.7825		1987.17
66	24.747		1987.19
67	24.7117		1987.22
68	24.6765		1987.24
69	24.6414		1987.27
70	24.6065		1987.3
71	24.5718		1987.32
72	24.5372		1987.35
73	24.5028		1987.37
74	24.4685		1987.4
75	24.4344		1987.43
76	24.4005		1987.45
77	24.3667		1987.48
78	24.3331		1987.5
79	24.2997		1987.53
80	24.2664		1987.56
81	24.2333		1987.58
82	24.2003		1987.61
83	24.1676		1987.63
84	24.135		1987.66
85	24.1026		1987.69
86	24.0704		1987.71
87	24.0383		1987.74
88	24.0064		1987.76
89	23.9747		1987.79
90	23.9432		1987.82
91	23.9119		1987.84
92	23.8807		1987.87
93	23.8498		1987.89
94	23.819		1987.92
95	23.7884		1987.95
96	23.758		1987.97
97	23.7278		1988
98	23.6978		1988.02
99	23.668		1988.05
100	23.6384		1988.08
101	23.6089		1988.1
102	23.5797		1988.13
103	23.5507		1988.15
104	23.5218		1988.18
105	23.4932		1988.21
106	23.4648		1988.23
107	23.4366		1988.26
108	23.4086		1988.28
109	23.3807		1988.31
110	23.3531		1988.34
111	23.3258		1988.36
112	23.2986		1988.39
113	23.2716		1988.41
114	23.2448		1988.44
115	23.2183		1988.47
116	23.192		1988.49
117	23.1659		1988.52
118	23.14		1988.55
119	23.1143		1988.57
120	23.0889		1988.6
121	23.0636		1988.62
122	23.0386		1988.65
123	23.0138		1988.68
124	22.9893		1988.7
125	22.9649		1988.73
126	22.9408		1988.75
127	22.917		1988.78
128	22.8933		1988.81
129	22.8699		1988.83
130	22.8467		1988.86
131	22.8238		1988.88
132	22.8011		1988.91
133	22.7786		1988.94
134	22.7563		1988.96
135	22.7343		1988.99
136	22.7126		1989.01
137	22.6911		1989.04
138	22.6698		1989.07
139	22.6488		1989.09
140	22.628		1989.12
141	22.6074		1989.14
142	22.5871		1989.17
143	22.5671		1989.2
144	22.5473		1989.22
145	22.5278		1989.25
146	22.5085		1989.27
147	22.4894		1989.3
148	22.4706		1989.33
149	22.4521		1989.35
150	22.4339		1989.38
151	22.4158		1989.4
152	22.3981		1989.43
153	22.3806		1989.46
154	22.3634		1989.48
155	22.3464		1989.51
156	22.3297		1989.53
157	22.3133		1989.56
158	22.2971		1989.59
159	22.2812		1989.61
160	22.2656		1989.64
161	22.2502		1989.66
162	22.2351		1989.69
163	22.2203		1989.72
164	22.2058		1989.74
165	22.1915		1989.77
166	22.1775		1989.79
167	22.1638		1989.82
168	22.1504		1989.85
169	22.1373		1989.87
170	22.1244		1989.9
171	22.1118		1989.92
172	22.0995		1989.95
173	22.0875		1989.98
174	22.0758		1990
175	22.0644		1990.03
176	22.0532		1990.05
177	22.0424		1990.08
178	22.0318		1990.11
179	22.0216		1990.13
180	22.0116		1990.16
181	22.0019		1990.18
182	21.9926		1990.21
183	21.9835		1990.24
184	21.9747		1990.26
185	21.9663		1990.29
186	21.9581		1990.31
187	21.9503		1990.34
188	21.9427		1990.37
189	21.9355		1990.39
190	21.9285		1990.42
191	21.9219		1990.44
192	21.9156		1990.47
193	21.9096		1990.5
194	21.9039		1990.52
195	21.8935		1990.55
196	21.8935		1990.58
197	21.8888		1990.6
198	21.8844		1990.63
199	21.8803		1990.65
200	21.8766		1990.68
201	21.8731		1990.71
202	21.87		1990.73
203	21.8673		1990.76
204	21.8648		1990.78
205	21.8627		1990.81
206	21.8608		1990.84
207	21.8593		1990.86
208	21.8581		1990.89
209	21.8572		1990.91
210	21.8566		1990.94
211	21.8563		1990.97
212	21.8563		1990.99
213	21.8566		1991.02
214	21.8572		1991.04
215	21.8581		1991.07
216	21.8592		1991.1
217	21.8607		1991.12
218	21.8624		1991.15
219	21.8644		1991.17
220	21.8667		1991.2
221	21.8693		1991.23
222	21.8721		1991.25
223	21.8752		1991.28
224	21.8785		1991.3
225	21.8821		1991.33
226	21.886		1991.36
227	21.8901		1991.38
228	21.8945		1991.41
229	21.8991		1991.43
230	21.904		1991.46
231	21.9091		1991.49
232	21.9145		1991.51
233	21.9201		1991.54
234	21.9259		1991.56
235	21.932		1991.59
236	21.9383		1991.62
237	21.9448		1991.64
238	21.9516		1991.67
239	21.9586		1991.69
240	21.9658		1991.72
241	21.9732		1991.75
242	21.9808		1991.77
243	21.9887		1991.8
244	21.9967		1991.82
245	22.005		1991.85
246	22.0135		1991.88
247	22.0221		1991.9
248	22.031		1991.93
249	22.0401		1991.95
250	22.0493		1991.98
251	22.0588		1992.01
252	22.0684		1992.03
253	22.0782		1992.06
254	22.0882		1992.08
255	22.0984		1992.11
256	22.1088		1992.14
257	22.1193		1992.16
258	22.13		1992.19
259	22.1409		1992.21
260	22.1519		1992.24
261	22.1631		1992.27
262	22.1745		1992.29
263	22.186		1992.32
264	22.1977		1992.34
265	22.2095		1992.37
266	22.2215		1992.4
267	22.2336		1992.42
268	22.2459		1992.45
269	22.2583		1992.47
270	22.2709		1992.5
271	22.2836		1992.53
272	22.2964		1992.55
273	22.3094		1992.58
274	22.3224		1992.61
275	22.3357		1992.63
276	22.349		1992.66
277	22.3624		1992.68
278	22.376		1992.71
279	22.3897		1992.74
280	22.4035		1992.76
281	22.4174		1992.79
282	22.4314		1992.81
283	22.4455		1992.81
284	22.4598		1992.87
285	22.4741		1992.89
286	22.4885		1992.92
287	22.503		1992.94
288	22.5176		1992.97
289	22.5323		1993
290	22.5471		1993.02
291	22.5619		1993.05
292	22.5768		1993.07
293	22.5918		1993.1
294	22.6069		1993.13
295	22.6221		1993.15
296	22.6373		1993.18
297	22.6525		1993.2
298	22.6679		1993.23
299	22.6833		1993.26
300	22.6987		1993.28
301	22.7142		1993.31
302	22.7298		1993.33
303	22.7454		1993.36
304	22.7611		1993.39
305	22.7768		1993.41
306	22.7925		1993.44
307	22.8083		1993.46
308	22.824		1993.49
309	22.8399		1993.52
310	22.8557		1993.54
311	22.8716		1993.57
312	22.8875		1993.59
313	22.9034		1993.62
314	22.9194		1993.65
315	22.9353		1993.67
316	22.9513		1993.7
317	22.9673		1993.72
318	22.9832		1993.75
319	22.9992		1993.78
320	23.0152		1993.8
321	23.0311		1993.83
322	23.0471		1993.85
323	23.063		1993.88
324	23.079		1993.91
325	23.0949		1993.93
326	23.1108		1993.96
327	23.1266		1993.98
328	23.1425		1994.01
329	23.1583		1994.04
330	23.1741		1994.06
331	23.1898		1994.09
332	23.2055		1994.11
333	23.2212		1994.14
334	23.2368		1994.17
335	23.2524		1994.19
336	23.2679		1994.22
337	23.2834		1994.24
338	23.2988		1994.27
339	23.3142		1994.3
340	23.3295		1994.32
341	23.3447		1994.35
342	23.3599		1994.37
343	23.375		1994.4
344	23.39		1994.43
345	23.4049		1994.45
346	23.4198		1994.48
347	23.4346		1994.51
348	23.4492		1994.53
349	23.4638		1994.56
350	23.4783		1994.58
351	23.4927		1994.61
352	23.507		1994.64
353	23.5212		1994.66
354	23.5353		1994.69
355	23.5493		1994.71
356	23.5632		1994.74
357	23.577		1994.77
358	23.5906		1994.79
359	23.6041		1994.82
360	23.6175		1994.84
361	23.6308		1994.87
362	23.6439		1994.9
363	23.6569		1994.92
364	23.6698		1994.95
365	23.6825		1994.97
366	23.6951		1995
367	23.7075		1995.03
368	23.7198		1995.05
369	23.7319		1995.08
370	23.7439		1995.1
371	23.7557		1995.13
372	23.7674		1995.16
373	23.7789		1995.18
374	23.7902		1995.21
375	23.8013		1995.23
376	23.8123		1995.26
377	23.8231		1995.29
378	23.8337		1995.31
379	23.8441		1995.34
380	23.8543		1995.36
381	23.8644		1995.39
382	23.8742		1995.42
383	23.8839		1995.44
384	23.8933		1995.47
385	23.9026		1995.49
386	23.9116		1995.52
387	23.9204		1995.55
388	23.929		1995.57
389	23.9374		1995.6
390	23.9456		1995.62
391	23.9535		1995.65
392	23.9613		1995.68
393	23.9688		1995.7
394	23.976		1995.73
395	23.983		1995.75
396	23.9898		1995.78
397	23.9964		1995.81
398	24.0027		1995.83
399	24.0087		1995.86
400	24.0145		1995.88
401	24.0201		1995.91
402	24.0253		1995.94
403	24.0304		1995.96
404	24.0351		1995.99
405	24.0397		1996.01
406	24.0439		1996.04
407	24.048		1996.07
408	24.0517		1996.09
409	24.0553		1996.12
410	24.0585		1996.14
411	24.0616		1996.17
412	24.0644		1996.2
413	24.0669		1996.22
414	24.0714		1996.25
415	24.0714		1996.27
416	24.0732		1996.3
417	24.0748		1996.33
418	24.0762		1996.35
419	24.0774		1996.38
420	24.0783		1996.4
421	24.079		1996.43
422	24.0795		1996.46
423	24.0797		1996.48
424	24.0797		1996.51
425	24.0795		1996.54
426	24.0791		1996.56
427	24.0785		1996.59
428	24.0776		1996.61
429	24.0766		1996.64
430	24.0753		1996.67
431	24.0738		1996.69
432	24.0721		1996.72
433	24.0702		1996.74
434	24.0681		1996.77
435	24.0658		1996.8
436	24.0632		1996.82
437	24.0605		1996.85
438	24.0576		1996.87
439	24.0545		1996.9
440	24.0512		1996.93
441	24.0477		1996.95
442	24.044		1996.98
443	24.0401		1997
444	24.036		1997.03
445	24.0317		1997.06
446	24.0272		1997.08
447	24.0226		1997.11
448	24.0178		1997.13
449	24.0128		1997.16
450	24.0076		1997.19
451	24.0022		1997.21
452	23.9966		1997.24
453	23.9909		1997.26
454	23.985		1997.29
455	23.979		1997.32
456	23.9727		1997.34
457	23.9663		1997.37
458	23.9598		1997.39
459	23.953		1997.42
460	23.9461		1997.45
461	23.9391		1997.47
462	23.9319		1997.5
463	23.9245		1997.52
464	23.917		1997.55
465	23.9093		1997.58
466	23.9014		1997.6
467	23.8934		1997.63
468	23.8853		1997.65
469	23.877		1997.68
470	23.8686		1997.71
471	23.86		1997.73
472	23.8513		1997.76
473	23.8424		1997.78
474	23.8334		1997.81
475	23.8243		1997.84
476	23.815		1997.86
477	23.8056		1997.89
478	23.7961		1997.91
479	23.7864		1997.94
480	23.7766		1997.97
481	23.7667		1997.99
482	23.7566		1998.02
483	23.7464		1998.04
484	23.7361		1998.07
485	23.7257		1998.1
486	23.7152		1998.12
487	23.7045		1998.15
488	23.6938		1998.17
489	23.6829		1998.2
490	23.6719		1998.23
491	23.6608		1998.25
492	23.6495		1998.28
493	23.6382		1998.3
494	23.6268		1998.33
495	23.6153		1998.36
496	23.6036		1998.38
497	23.5919		1998.41
498	23.5801		1998.43
499	23.5681		1998.46
500	23.5561		1998.49
501	23.544		1998.51
502	23.5318		1998.54
503	23.5195		1998.57
504	23.5071		1998.59
505	23.4946		1998.62
506	23.4821		1998.64
507	23.4694		1998.67
508	23.4567		1998.7
509	23.4439		1998.72
510	23.431		1998.75
511	23.418		1998.77
512	23.405		1998.8
513	23.3919		1998.83
514	23.3787		1998.85
515	23.3655		1998.88
516	23.3521		1998.9
517	23.3388		1998.93
518	23.3253		1998.96
519	23.3118		1998.98
520	23.2982		1999.01
521	23.2846		1999.03
522	23.2709		1999.06
523	23.2571		1999.09
524	23.2433		1999.11
525	23.2295		1999.14
526	23.2155		1999.16
527	23.2016		1999.19
528	23.1876		1999.22
529	23.1735		1999.24
530	23.1594		1999.27
531	23.1453		1999.29
532	23.1311		1999.32
533	23.1168		1999.35
534	23.1026		1999.37
535	23.0883		1999.4
536	23.0739		1999.42
537	23.0595		1999.45
538	23.0451		1999.48
539	23.0307		1999.5
540	23.0162		1999.53
541	23.0017		1999.55
542	22.9872		1999.58
543	22.9726		1999.61
544	22.9581		1999.63
545	22.9435		1999.66
546	22.9289		1999.68
547	22.9142		1999.71
548	22.8996		1999.74
549	22.8849		1999.76
550	22.8703		1999.79
551	22.8556		1999.81
552	22.8409		1999.84
553	22.8262		1999.87
554	22.8114		1999.89
555	22.7967		1999.92
556	22.782		1999.94
557	22.7673		1999.97
558	22.7526		2000
559	22.7378		2000.02
560	22.7231		2000.05
561	22.7084		2000.07
562	22.6937		2000.1
563	22.679		2000.13
564	22.6643		2000.15
565	22.6496		2000.18
566	22.6349		2000.2
567	22.6202		2000.23
568	22.6056		2000.26
569	22.5909		2000.28
570	22.5763		2000.31
571	22.5617		2000.33
572	22.5471		2000.36
573	22.5326		2000.39
574	22.5181		2000.41
575	22.5035		2000.44
576	22.4891		2000.46
577	22.4746		2000.49
578	22.4602		2000.52
579	22.4458		2000.54
580	22.4314		2000.57
581	22.4171		2000.6
582	22.4028		2000.62
583	22.3886		2000.65
584	22.3743		2000.67
585	22.3602		2000.7
586	22.346		2000.73
587	22.3319		2000.75
588	22.3179		2000.78
589	22.3039		2000.8
590	22.2899		2000.83
591	22.276		2000.86
592	22.2622		2000.88
593	22.2484		2000.91
594	22.2346		2000.93
595	22.2209		2000.96
596	22.2073		2000.99
597	22.1937		2001.01
598	22.1802		2001.04
599	22.1667		2001.06
600	22.1533		2001.09
601	22.14		2001.12
602	22.1267		2001.14
603	22.1135		2001.17
604	22.1004		2001.19
605	22.0873		2001.22
606	22.0742		2001.25
607	22.0613		2001.27
608	22.0483		2001.3
609	22.0355		2001.32
610	22.0227		2001.35
611	22.0099		2001.38
612	21.9972		2001.4
613	21.9845		2001.43
614	21.9719		2001.45
615	21.9594		2001.48
616	21.9468		2001.51
617	21.9344		2001.53
618	21.9219		2001.56
619	21.9096		2001.58
620	21.8972		2001.61
621	21.8849		2001.64
622	21.8726		2001.66
623	21.8604		2001.69
624	21.8482		2001.71
625	21.8361		2001.74
626	21.824		2001.77
627	21.8119		2001.79
628	21.7998		2001.82
629	21.7878		2001.84
630	21.7758		2001.87
631	21.7639		2001.9
632	21.7519		2001.92
633	21.74		2001.95
634	21.7281		2001.97
635	21.7163		2002
636	21.7044		2002.03
637	21.6926		2002.05
638	21.6808		2002.08
639	21.6691		2002.1
640	21.6573		2002.13
641	21.6456		2002.16
642	21.6339		2002.18
643	21.6222		2002.21
644	21.6105		2002.23
645	21.5988		2002.26
646	21.5871		2002.29
647	21.5755		2002.31
648	21.5638		2002.34
649	21.5522		2002.36
650	21.5406		2002.39
651	21.529		2002.42
652	21.5173		2002.44
653	21.5057		2002.47
654	21.4941		2002.49
655	21.4825		2002.52
656	21.4709		2002.55
657	21.4593		2002.57
658	21.4477		2002.6
659	21.4361		2002.63
660	21.4245		2002.65
661	21.4128		2002.68
662	21.4012		2002.7
663	21.3896		2002.73
664	21.3779		2002.76
665	21.3663		2002.78
666	21.3546		2002.81
667	21.343		2002.83
668	21.3313		2002.86
669	21.3196		2002.89
670	21.3079		2002.91
671	21.2961		2002.94
672	21.2844		2002.96
673	21.2726		2002.99
674	21.2608		2003.02
675	21.249		2003.04
676	21.2372		2003.07
677	21.2254		2003.09
678	21.2135		2003.12
679	21.2016		2003.15
680	21.1897		2003.17
681	21.1778		2003.2
682	21.1658		2003.22
683	21.1538		2003.25
684	21.1418		2003.28
685	21.1297		2003.3
686	21.1176		2003.33
687	21.1055		2003.35
688	21.0933		2003.38
689	21.0811		2003.41
690	21.0689		2003.43
691	21.0566		2003.46
692	21.0443		2003.48
693	21.032		2003.51
694	21.0196		2003.54
695	21.0072		2003.56
696	20.9947		2003.59
697	20.9822		2003.61
698	20.9697		2003.64
699	20.9571		2003.67
700	20.9444		2003.69
701	20.9317		2003.72
702	20.919		2003.74
703	20.9062		2003.77
704	20.8934		2003.8
705	20.8805		2003.82
706	20.8675		2003.85
707	20.8545		2003.87
708	20.8415		2003.9
709	20.8284		2003.93
710	20.8152		2003.95
711	20.802		2003.98
712	20.7887		2004
713	20.7754		2004.03
714	20.762		2004.06
715	20.7486		2004.08
716	20.735		2004.11
717	20.7215		2004.13
718	20.7078		2004.16
719	20.6941		2004.19
720	20.6803		2004.21
721	20.6665		2004.24
722	20.6526		2004.26
723	20.6386		2004.29
724	20.6245		2004.32
725	20.6104		2004.34
726	20.5962		2004.37
727	20.5819		2004.39
728	20.5676		2004.42
729	20.5532		2004.45
730	20.5387		2004.47
731	20.5241		2004.5
732	20.5095		2004.53
733	20.4947		2004.55
734	20.4799		2004.58
735	20.4651		2004.6
736	20.4501		2004.63
737	20.435		2004.66
738	20.4199		2004.68
739	20.4047		2004.71
740	20.3894		2004.73
741	20.374		2004.76
742	20.3585		2004.79
743	20.343		2004.81
744	20.3273		2004.84
745	20.3116		2004.86
746	20.2958		2004.89
747	20.2798		2004.92
748	20.2638		2004.94
749	20.2477		2004.97
750	20.2315		2004.99
751	20.2152		2005.02
752	20.1988		2005.05
753	20.1823		2005.07
754	20.1657		2005.1
755	20.1491		2005.12
756	20.1323		2005.15
757	20.1154		2005.18
758	20.0984		2005.2
759	20.0813		2005.23
760	20.0641		2005.25
761	20.0469		2005.28
762	20.0295		2005.31
763	20.012		2005.33
764	19.9943		2005.36
765	19.9766		2005.38
766	19.9588		2005.41
767	19.9409		2005.44
768	19.9228		2005.46
769	19.9047		2005.49
770	19.8864		2005.51
771	19.8681		2005.54
772	19.8496		2005.57
773	19.831		2005.59
774	19.8123		2005.62
775	19.7935		2005.64
776	19.7745		2005.67
777	19.7555		2005.7
778	19.7363		2005.72
779	19.717		2005.75
780	19.6976		2005.77
781	19.6781		2005.8
782	19.6584		2005.83
783	19.6386		2005.85
784	19.6187		2005.88
785	19.5987		2005.9
786	19.5786		2005.93
787	19.5583		2005.96
788	19.5379		2005.98
789	19.5174		2006.01
790	19.4968		2006.03
791	19.476		2006.06
792	19.4552		2006.09
793	19.4341		2006.11
794	19.413		2006.14
795	19.3917		2006.16
796	19.3703		2006.19
797	19.3488		2006.22
798	19.3271		2006.24
799	19.3053		2006.27
800	19.2834		2006.29
801	19.2613		2006.32
802	19.2391		2006.35
803	19.2168		2006.37
804	19.1944		2006.4
805	19.1718		2006.42
806	19.1491		2006.45
807	19.1262		2006.48
808	19.1033		2006.5
809	19.0802		2006.53
810	19.057		2006.56
811	19.0336		2006.58
812	19.0102		2006.61
813	18.9866		2006.63
814	18.9629		2006.66
815	18.9391		2006.69
816	18.9152		2006.71
817	18.8911		2006.74
818	18.867		2006.76
819	18.8427		2006.79
820	18.8183		2006.82
821	18.7939		2006.84
822	18.7693		2006.87
823	18.7446		2006.89
824	18.7197		2006.92
825	18.6948		2006.95
826	18.6698		2006.97
827	18.6447		2007
828	18.6194		2007.02
829	18.5941		2007.05
830	18.5687		2007.08
831	18.5432		2007.1
832	18.5175		2007.13
833	18.4918		2007.15
834	18.466		2007.18
835	18.4401		2007.21
836	18.4141		2007.23
837	18.388		2007.26
838	18.3618		2007.28
839	18.3355		2007.31
840	18.3091		2007.34
841	18.2827		2007.36
842	18.2561		2007.39
843	18.2295		2007.41
844	18.176		2007.44
845	18.176		2007.47
846	18.1491		2007.49
847	18.1222		2007.52
848	18.0951		2007.54
849	18.068		2007.57
850	18.0408		2007.6
851	18.0136		2007.62
852	17.9862		2007.65
853	17.9588		2007.67
854	17.9313		2007.7
855	17.9037		2007.73
856	17.8761		2007.75
857	17.8484		2007.78
858	17.8206		2007.8
859	17.7928		2007.83
860	17.7649		2007.86
861	17.7369		2007.88
862	17.7088		2007.91
863	17.6807		2007.93
864	17.6526		2007.96
865	17.6243		2007.99
866	17.5961		2008.01
867	17.5677		2008.04
868	17.5393		2008.06
869	17.5108		2008.09
870	17.4823		2008.12
871	17.4537		2008.14
872	17.4251		2008.17
873	17.3964		2008.19
874	17.3677		2008.22
875	17.3389		2008.25
876	17.3101		2008.27
877	17.2812		2008.3
878	17.2523		2008.32
879	17.2233		2008.35
880	17.1943		2008.38
881	17.1652		2008.4
882	17.1361		2008.43
883	17.1069		2008.45
884	17.0777		2008.48
885	17.0485		2008.51
886	17.0192		2008.53
887	16.9899		2008.56
888	16.9605		2008.59
889	16.9311		2008.61
890	16.9017		2008.64
891	16.8723		2008.66
892	16.8428		2008.69
893	16.8132		2008.72
894	16.7837		2008.74
895	16.7541		2008.77
896	16.7245		2008.79
897	16.6948		2008.82
898	16.6651		2008.85
899	16.6354		2008.87
900	16.6057		2008.9
901	16.5759		2008.92
902	16.5462		2008.95
903	16.5163		2008.98
904	16.4865		2009
905	16.4567		2009.03
906	16.4268		2009.05
907	16.3969		2009.08
908	16.367		2009.11
909	16.3371		2009.13
910	16.3071		2009.16
911	16.2772		2009.18
912	16.2472		2009.21
913	16.2172		2009.24
914	16.1872		2009.26
915	16.1572		2009.29
916	16.1272		2009.31
917	16.0972		2009.34
918	16.0671		2009.37
919	16.0371		2009.39
920	16.007		2009.42
921	15.9769		2009.44
922	15.9469		2009.47
923	15.9168		2009.5
924	15.8867		2009.52
925	15.8566		2009.55
926	15.8265		2009.57
927	15.7964		2009.6
928	15.7664		2009.63
929	15.7363		2009.65
930	15.7062		2009.68
931	15.6761		2009.7
932	15.646		2009.73
933	15.6159		2009.76
934	15.5858		2009.78
935	15.5558		2009.81
936	15.5257		2009.83
937	15.4956		2009.86
938	15.4656		2009.89
939	15.4355		2009.91
940	15.4055		2009.94
941	15.3755		2009.96
942	15.3454		2009.99
943	15.3154		2010.02
944	15.2854		2010.04
945	15.2554		2010.07
946	15.2255		2010.09
947	15.1955		2010.12
948	15.1656		2010.15
949	15.1357		2010.17
950	15.1057		2010.2
951	15.0759		2010.22
952	15.046		2010.25
953	15.0161		2010.28
954	14.9863		2010.3
955	14.9565		2010.33
956	14.9267		2010.35
957	14.8969		2010.38
958	14.8672		2010.41
959	14.8374		2010.43
960	14.8077		2010.46
961	14.7781		2010.48
962	14.7484		2010.51
963	14.7188		2010.54
964	14.6892		2010.56
965	14.6596		2010.59
966	14.6301		2010.62
967	14.6005		2010.64
968	14.571		2010.67
969	14.5416		2010.69
970	14.5122		2010.72
971	14.4828		2010.75
972	14.4534		2010.77
973	14.4241		2010.8
974	14.3948		2010.82
975	14.3655		2010.85
976	14.3363		2010.88
977	14.3071		2010.9
978	14.2779		2010.93
979	14.2488		2010.95
980	14.2197		2010.98
981	14.1907		2011.01
982	14.1617		2011.03
983	14.1327		2011.06
984	14.1037		2011.08
985	14.0749		2011.11
986	14.046		2011.14
987	14.0172		2011.16
988	13.9884		2011.19
989	13.9597		2011.21
990	13.931		2011.24
991	13.9024		2011.27
992	13.8738		2011.29
993	13.8452		2011.32
994	13.8167		2011.34
995	13.7883		2011.37
996	13.7599		2011.4
997	13.7315		2011.42
998	13.7032		2011.45
999	13.6749		2011.47
1000	13.6467		2011.5
